# Supplementary material for: Theoretical calculations of stability constants and pKa values of metal complexes in solution: application to pyridoxamine–copper(ii) complexes and their biological implications in AGE inhibition
Source: Royal Society of Chemistry journal article supplement (doi:10.1039/c3cp50840d), 2013-01-01
Supplement: c3cp50840d.pdf [file c3cp50840d.pdf]

**Theoretical calculations of stability constants and  $pK_a$  values of metal complexes in solution.  
Application to Pyridoxamine-Copper(II) complexes and their biological implications in AGE  
inhibition**

Rodrigo Casasnovas, Joaquín Ortega-Castro, Josefa Donoso, Juan Frau, Francisco Muñoz

Institut d'Investigació en Ciències de la Salut (IUNICS). Departament de Química. Universitat de les Illes Balears. E-  
07122 Palma de Mallorca, Spain

Corresponding Author: [juan.frau@uib.es](mailto:juan.frau@uib.es)

**Supporting Information.**

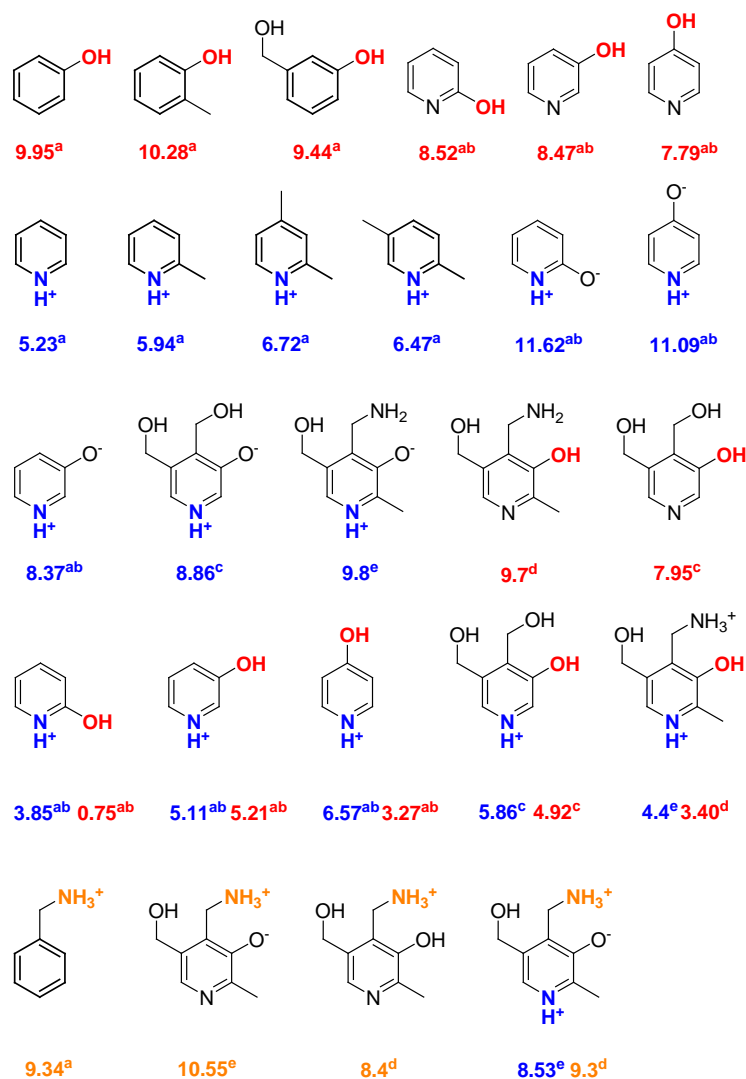

Chart 1-SP. Benchmark set of phenols, pyridines and benzylamines used in the calibration of eqns 10 and 13. Experimental  $pK_a$  values taken from references 1(a), 2(b), 3(c), 4(d) and 5(e).

## References

- 1) R. Williams,  $pK_a$  Data. Available from:  
<[http://www.research.che.edu.psu.edu/brpgroup/pKa\\_compilation.pdf](http://www.research.che.edu.psu.edu/brpgroup/pKa_compilation.pdf)>.
- 2) Karelson, M. M.; Katrizky, A. R.; Szafran, M.; Zerner, M. C. *J. Org. Chem.* **1989**, *54*, 6030-6034.
- 3) Takács-Novák, K.; Tam, K. Y. *J. Pharm. Biomed. Anal.* **2000**, *21*, 1171-1182.
- 4) Christen, P.; Metzler, D. E. In *Transaminases*; John Wiley: New York, **1985**.
- 5) Vilanova, B.; Adrover, M.; Muñoz, F.; Donoso, J. *Chem. & Biodiv.* **2004**, *1*, 1073-1090.

### Optimized geometries and energetic parameters of the benchmark 1 Cu<sup>2+</sup> complexes

#### [Cu(Gly)(H<sub>2</sub>O)<sub>2</sub>]<sup>+</sup>

Zero-point correction= 0.121266 (Hartree/Particle)  
Thermal correction to Energy= 0.132646  
Thermal correction to Enthalpy= 0.133590  
Thermal correction to Gibbs Free Energy= 0.083727  
Sum of electronic and zero-point Energies= -2076.848192  
Sum of electronic and thermal Energies= -2076.836811  
Sum of electronic and thermal Enthalpies= -2076.835867  
Sum of electronic and thermal Free Energies= -2076.885730

|               | E (Thermal)<br>KCal/Mol | CV<br>Cal/Mol-Kelvin | S<br>Cal/Mol-Kelvin |
|---------------|-------------------------|----------------------|---------------------|
| Total         | 83.237                  | 39.940               | 104.946             |
| Electronic    | 0.000                   | 0.000                | 1.377               |
| Translational | 0.889                   | 2.981                | 41.351              |
| Rotational    | 0.889                   | 2.981                | 29.344              |
| Vibrational   | 81.459                  | 33.979               | 32.873              |

Input orientation:

| Center<br>Number | Atomic<br>Number | Atomic<br>Type | Coordinates (Angstroms) |           |           |
|------------------|------------------|----------------|-------------------------|-----------|-----------|
|                  |                  |                | X                       | Y         | Z         |
| 1                | 8                | 0              | 1.948052                | 0.924724  | 0.669223  |
| 2                | 6                | 0              | 2.214538                | 2.093786  | 0.210603  |
| 3                | 6                | 0              | 1.078893                | 2.852560  | -0.442115 |
| 4                | 1                | 0              | 0.862350                | 3.720087  | 0.187206  |
| 5                | 1                | 0              | 1.416627                | 3.233872  | -1.408751 |
| 6                | 1                | 0              | -0.960173               | 2.516741  | -0.265176 |
| 7                | 1                | 0              | -0.286855               | 1.771657  | -1.557458 |
| 8                | 8                | 0              | 3.322372                | 2.627040  | 0.291260  |
| 9                | 7                | 0              | -0.128261               | 2.024603  | -0.583937 |
| 10               | 29               | 0              | 0.113736                | 0.319244  | 0.439145  |
| 11               | 8                | 0              | -1.840596               | -0.175800 | 0.132255  |
| 12               | 1                | 0              | -2.049352               | -1.021573 | 0.551571  |
| 13               | 8                | 0              | 0.548508                | -1.381103 | 1.437187  |
| 14               | 1                | 0              | -0.197881               | -1.703429 | 1.958574  |
| 15               | 1                | 0              | -2.412456               | 0.471591  | 0.565785  |
| 16               | 1                | 0              | 1.262897                | -1.219424 | 2.067418  |

## Glycine ligand

Zero-point correction= 0.066396 (Hartree/Particle)  
Thermal correction to Energy= 0.071703  
Thermal correction to Enthalpy= 0.072647  
Thermal correction to Gibbs Free Energy= 0.037456  
Sum of electronic and zero-point Energies= -283.855877  
Sum of electronic and thermal Energies= -283.850570  
Sum of electronic and thermal Enthalpies= -283.849626  
Sum of electronic and thermal Free Energies= -283.884817

|               | E (Thermal)<br>KCal/Mol | CV<br>Cal/Mol-Kelvin | S<br>Cal/Mol-Kelvin |
|---------------|-------------------------|----------------------|---------------------|
| Total         | 44.994                  | 17.085               | 74.065              |
| Electronic    | 0.000                   | 0.000                | 0.000               |
| Translational | 0.889                   | 2.981                | 38.821              |
| Rotational    | 0.889                   | 2.981                | 25.280              |
| Vibrational   | 43.217                  | 11.123               | 9.964               |

### Input orientation:

```
-----  
Center Atomic Atomic Coordinates (Angstroms)  
Number Number Type X Y Z  
-----  
 1 8 0 -0.995767 0.859288 -0.649027  
 2 6 0 -1.954318 0.287355 -0.076201  
 3 6 0 -1.831695 -1.195080 0.235862  
 4 1 0 -2.247341 -1.367600 1.233821  
 5 1 0 -2.514085 -1.699231 -0.467806  
 6 1 0 -0.478014 -2.703394 0.090422  
 7 1 0 -0.039723 -1.334504 -0.680772  
 8 8 0 -3.048609 0.829224 0.232721  
 9 7 0 -0.464546 -1.690748 0.172034  
-----
```

[Cu( $\beta$ -Ala)(H<sub>2</sub>O)<sub>2</sub>]<sup>+</sup>

Zero-point correction= 0.150569 (Hartree/Particle)  
Thermal correction to Energy= 0.162824  
Thermal correction to Enthalpy= 0.163768  
Thermal correction to Gibbs Free Energy= 0.112147  
Sum of electronic and zero-point Energies= -2116.111120  
Sum of electronic and thermal Energies= -2116.098864  
Sum of electronic and thermal Enthalpies= -2116.097920  
Sum of electronic and thermal Free Energies= -2116.149541

|               | E (Thermal)<br>KCal/Mol | CV<br>Cal/Mol-Kelvin | S<br>Cal/Mol-Kelvin |
|---------------|-------------------------|----------------------|---------------------|
| Total         | 102.174                 | 44.158               | 108.646             |
| Electronic    | 0.000                   | 0.000                | 1.377               |
| Translational | 0.889                   | 2.981                | 41.584              |
| Rotational    | 0.889                   | 2.981                | 30.010              |
| Vibrational   | 100.396                 | 38.196               | 35.675              |

Input orientation:

| Center<br>Number | Atomic<br>Number | Atomic<br>Type | Coordinates (Angstroms) |           |           |
|------------------|------------------|----------------|-------------------------|-----------|-----------|
|                  |                  |                | X                       | Y         | Z         |
| 1                | 6                | 0              | -2.954095               | -1.255105 | 0.253917  |
| 2                | 6                | 0              | -3.067759               | 1.022546  | 1.381747  |
| 3                | 6                | 0              | -3.203486               | -0.476472 | 1.525291  |
| 4                | 1                | 0              | -3.501557               | 1.519327  | 2.255801  |
| 5                | 1                | 0              | -3.607348               | 1.379286  | 0.499618  |
| 6                | 1                | 0              | -2.492633               | -0.840196 | 2.281152  |
| 7                | 1                | 0              | -4.202627               | -0.727429 | 1.889149  |
| 8                | 1                | 0              | 0.905552                | 0.163859  | -2.215005 |
| 9                | 1                | 0              | -0.172474               | -0.939803 | -2.246481 |
| 10               | 8                | 0              | 0.943970                | 1.692997  | 0.189654  |
| 11               | 8                | 0              | -2.038528               | -0.842355 | -0.549173 |
| 12               | 8                | 0              | -3.622578               | -2.268000 | 0.016023  |
| 13               | 7                | 0              | -1.655001               | 1.413148  | 1.240484  |
| 14               | 29               | 0              | -0.659420               | 0.468833  | -0.193991 |
| 15               | 1                | 0              | -1.575106               | 2.417280  | 1.080011  |
| 16               | 1                | 0              | -1.156179               | 1.218407  | 2.110112  |
| 17               | 8                | 0              | 0.420651                | -0.456978 | -1.656074 |
| 18               | 1                | 0              | 1.713577                | 1.446604  | -0.340305 |
| 19               | 1                | 0              | 0.748650                | 2.608194  | -0.052873 |

### $\beta$ -alanine ligand

Zero-point correction= 0.094953 (Hartree/Particle)  
Thermal correction to Energy= 0.101487  
Thermal correction to Enthalpy= 0.102432  
Thermal correction to Gibbs Free Energy= 0.064143  
Sum of electronic and zero-point Energies= -323.118622  
Sum of electronic and thermal Energies= -323.112088  
Sum of electronic and thermal Enthalpies= -323.111144  
Sum of electronic and thermal Free Energies= -323.149433

|               | E (Thermal)<br>KCal/Mol | CV<br>Cal/Mol-Kelvin | S<br>Cal/Mol-Kelvin |
|---------------|-------------------------|----------------------|---------------------|
| Total         | 63.684                  | 21.782               | 80.586              |
| Electronic    | 0.000                   | 0.000                | 0.000               |
| Translational | 0.889                   | 2.981                | 39.338              |
| Rotational    | 0.889                   | 2.981                | 26.637              |
| Vibrational   | 61.907                  | 15.821               | 14.611              |

#### Input orientation:

| Center<br>Number | Atomic<br>Number | Atomic<br>Type | Coordinates (Angstroms) |           |           |
|------------------|------------------|----------------|-------------------------|-----------|-----------|
|                  |                  |                | X                       | Y         | Z         |
| 1                | 6                | 0              | -0.771997               | 0.152694  | 0.389832  |
| 2                | 1                | 0              | -0.391769               | -0.871871 | 0.315229  |
| 3                | 1                | 0              | -1.869960               | 0.084794  | 0.357096  |
| 4                | 6                | 0              | -0.297595               | 0.957052  | -0.802584 |
| 5                | 1                | 0              | -0.693834               | 0.503335  | -1.719432 |
| 6                | 1                | 0              | -0.692819               | 1.978121  | -0.740469 |
| 7                | 7                | 0              | -0.275034               | 0.742714  | 1.632398  |
| 8                | 1                | 0              | -0.662120               | 1.680261  | 1.723575  |
| 9                | 1                | 0              | -0.629728               | 0.215991  | 2.425948  |
| 10               | 6                | 0              | 1.221017                | 0.999869  | -0.909019 |
| 11               | 8                | 0              | 1.786161                | 2.124616  | -0.876497 |
| 12               | 8                | 0              | 1.818894                | -0.102170 | -1.027185 |

**[Cu(Adp)(H<sub>2</sub>O)<sub>2</sub>]**

Zero-point correction= 0.191101 (Hartree/Particle)  
Thermal correction to Energy= 0.207119  
Thermal correction to Enthalpy= 0.208063  
Thermal correction to Gibbs Free Energy= 0.146766  
Sum of electronic and zero-point Energies= -2327.401275  
Sum of electronic and thermal Energies= -2327.385257  
Sum of electronic and thermal Enthalpies= -2327.384313  
Sum of electronic and thermal Free Energies= -2327.445610

|               | E (Thermal)<br>KCal/Mol | CV<br>Cal/Mol-Kelvin | S<br>Cal/Mol-Kelvin |
|---------------|-------------------------|----------------------|---------------------|
| Total         | 129.969                 | 57.230               | 129.011             |
| Electronic    | 0.000                   | 0.000                | 1.377               |
| Translational | 0.889                   | 2.981                | 42.365              |
| Rotational    | 0.889                   | 2.981                | 31.929              |
| Vibrational   | 128.192                 | 51.269               | 53.340              |

Input orientation:

| Center<br>Number | Atomic<br>Number | Atomic<br>Type | Coordinates (Angstroms)<br>X Y Z |           |           |
|------------------|------------------|----------------|----------------------------------|-----------|-----------|
| 1                | 6                | 0              | 0.931144                         | 1.642471  | 0.029752  |
| 2                | 6                | 0              | -2.534226                        | 2.043396  | -0.964136 |
| 3                | 6                | 0              | 0.415243                         | 2.663967  | 1.016274  |
| 4                | 6                | 0              | -1.646502                        | 3.172511  | -0.412381 |
| 5                | 6                | 0              | -1.090883                        | 2.887846  | 0.992366  |
| 6                | 1                | 0              | 0.754408                         | 2.358546  | 2.014595  |
| 7                | 1                | 0              | -2.209214                        | 1.087575  | -0.551075 |
| 8                | 1                | 0              | -2.222472                        | 4.104422  | -0.416890 |
| 9                | 1                | 0              | -3.577426                        | 2.210582  | -0.677763 |
| 10               | 1                | 0              | 0.946044                         | 3.599409  | 0.798348  |
| 11               | 1                | 0              | -0.808235                        | 3.345745  | -1.101484 |
| 12               | 1                | 0              | -1.601605                        | 2.016191  | 1.419340  |
| 13               | 1                | 0              | -1.313198                        | 3.722647  | 1.666111  |
| 14               | 6                | 0              | -2.449120                        | 1.978219  | -2.466047 |
| 15               | 8                | 0              | -3.263376                        | 2.606934  | -3.161200 |
| 16               | 8                | 0              | -1.506649                        | 1.286193  | -3.003123 |
| 17               | 8                | 0              | 0.064024                         | 0.849163  | -0.472562 |
| 18               | 8                | 0              | 2.145660                         | 1.618912  | -0.253063 |
| 19               | 29               | 0              | 0.114427                         | 0.385920  | -2.366627 |
| 20               | 8                | 0              | 1.949377                         | -0.430681 | -2.027532 |
| 21               | 1                | 0              | 2.500284                         | -0.372252 | -2.818632 |
| 22               | 8                | 0              | 0.331369                         | -0.053189 | -4.347939 |
| 23               | 1                | 0              | 0.656456                         | -0.950606 | -4.496760 |
| 24               | 1                | 0              | -0.545610                        | -0.013354 | -4.752719 |
| 25               | 1                | 0              | 2.296508                         | 0.242720  | -1.392197 |

### Adipic acid ligand

Zero-point correction= 0.136117 (Hartree/Particle)  
Thermal correction to Energy= 0.146615  
Thermal correction to Enthalpy= 0.147559  
Thermal correction to Gibbs Free Energy= 0.096630  
Sum of electronic and zero-point Energies= -534.416976  
Sum of electronic and thermal Energies= -534.406479  
Sum of electronic and thermal Enthalpies= -534.405534  
Sum of electronic and thermal Free Energies= -534.456463

|               | E (Thermal)<br>KCal/Mol | CV<br>Cal/Mol-Kelvin | S<br>Cal/Mol-Kelvin |
|---------------|-------------------------|----------------------|---------------------|
| Total         | 92.002                  | 34.770               | 107.189             |
| Electronic    | 0.000                   | 0.000                | 0.000               |
| Translational | 0.889                   | 2.981                | 40.806              |
| Rotational    | 0.889                   | 2.981                | 30.514              |
| Vibrational   | 90.225                  | 28.809               | 35.869              |

#### Input orientation:

| Center<br>Number | Atomic<br>Number | Atomic<br>Type | Coordinates (Angstroms) |           |           |
|------------------|------------------|----------------|-------------------------|-----------|-----------|
|                  |                  |                | X                       | Y         | Z         |
| 1                | 6                | 0              | 2.696718                | -0.249563 | 0.755321  |
| 2                | 6                | 0              | 2.650651                | 4.540917  | -0.778185 |
| 3                | 6                | 0              | 1.963521                | 1.076944  | 0.860804  |
| 4                | 6                | 0              | 1.923833                | 3.464093  | 0.020042  |
| 5                | 6                | 0              | 2.654210                | 2.134257  | 0.006386  |
| 6                | 1                | 0              | 0.926579                | 0.955284  | 0.525400  |
| 7                | 1                | 0              | 3.632940                | 4.726270  | -0.326328 |
| 8                | 1                | 0              | 0.911502                | 3.327610  | -0.388199 |
| 9                | 1                | 0              | 2.807860                | 4.191629  | -1.805709 |
| 10               | 1                | 0              | 1.947705                | 1.409226  | 1.906147  |
| 11               | 1                | 0              | 1.797516                | 3.802092  | 1.058695  |
| 12               | 1                | 0              | 3.683770                | 2.277937  | 0.364746  |
| 13               | 1                | 0              | 2.732728                | 1.772542  | -1.029501 |
| 14               | 6                | 0              | 1.841168                | 5.826604  | -0.790699 |
| 15               | 8                | 0              | 1.088009                | 6.035632  | -1.778764 |
| 16               | 8                | 0              | 1.940828                | 6.584953  | 0.210659  |
| 17               | 8                | 0              | 2.273818                | -1.087937 | -0.084622 |
| 18               | 8                | 0              | 3.710788                | -0.411879 | 1.485423  |



**[Cu(Ala)(H<sub>2</sub>O)<sub>2</sub>]<sup>+</sup>**

Zero-point correction= 0.149235 (Hartree/Particle)  
Thermal correction to Energy= 0.162064  
Thermal correction to Enthalpy= 0.163008  
Thermal correction to Gibbs Free Energy= 0.109409  
Sum of electronic and zero-point Energies= -2116.114339  
Sum of electronic and thermal Energies= -2116.101510  
Sum of electronic and thermal Enthalpies= -2116.100565  
Sum of electronic and thermal Free Energies= -2116.154165

|               | E (Thermal)<br>KCal/Mol | CV<br>Cal/Mol-Kelvin | S<br>Cal/Mol-Kelvin |
|---------------|-------------------------|----------------------|---------------------|
| Total         | 101.697                 | 45.148               | 112.809             |
| Electronic    | 0.000                   | 0.000                | 1.377               |
| Translational | 0.889                   | 2.981                | 41.584              |
| Rotational    | 0.889                   | 2.981                | 29.963              |
| Vibrational   | 99.919                  | 39.187               | 39.885              |

Input orientation:

| Center<br>Number | Atomic<br>Number | Atomic<br>Type | Coordinates (Angstroms) |           |           |
|------------------|------------------|----------------|-------------------------|-----------|-----------|
|                  |                  |                | X                       | Y         | Z         |
| 1                | 8                | 0              | 0.586576                | -1.307488 | -0.183612 |
| 2                | 6                | 0              | 1.739456                | -0.743105 | -0.231507 |
| 3                | 6                | 0              | 1.754629                | 0.778528  | -0.219148 |
| 4                | 1                | 0              | 2.518085                | 1.120642  | -0.925481 |
| 5                | 1                | 0              | 0.240208                | 2.197107  | -0.199392 |
| 6                | 1                | 0              | 0.378296                | 1.404509  | -1.628815 |
| 7                | 8                | 0              | 2.806374                | -1.357866 | -0.240229 |
| 8                | 7                | 0              | 0.426228                | 1.286024  | -0.617702 |
| 9                | 29               | 0              | -0.937664               | -0.092840 | -0.131080 |
| 10               | 8                | 0              | -2.492645               | 1.208039  | -0.206184 |
| 11               | 1                | 0              | -3.262509               | 0.877290  | 0.276211  |
| 12               | 8                | 0              | -2.186100               | -1.610328 | 0.400633  |
| 13               | 1                | 0              | -2.789251               | -1.334618 | 1.103418  |
| 14               | 1                | 0              | -2.274669               | 2.056223  | 0.203136  |
| 15               | 1                | 0              | -1.669509               | -2.337889 | 0.771754  |
| 16               | 6                | 0              | 2.091791                | 1.252988  | 1.180499  |
| 17               | 1                | 0              | 3.067905                | 0.870798  | 1.487331  |
| 18               | 1                | 0              | 2.124046                | 2.345854  | 1.214128  |
| 19               | 1                | 0              | 1.338967                | 0.902721  | 1.896344  |

### Alanine ligand

Zero-point correction= 0.094060 (Hartree/Particle)  
Thermal correction to Energy= 0.100715  
Thermal correction to Enthalpy= 0.101660  
Thermal correction to Gibbs Free Energy= 0.062770  
Sum of electronic and zero-point Energies= -323.120786  
Sum of electronic and thermal Energies= -323.114130  
Sum of electronic and thermal Enthalpies= -323.113186  
Sum of electronic and thermal Free Energies= -323.152076

|               | E (Thermal)<br>KCal/Mol | CV<br>Cal/Mol-Kelvin | S<br>Cal/Mol-Kelvin |
|---------------|-------------------------|----------------------|---------------------|
| Total         | 63.200                  | 22.610               | 81.850              |
| Electronic    | 0.000                   | 0.000                | 0.000               |
| Translational | 0.889                   | 2.981                | 39.338              |
| Rotational    | 0.889                   | 2.981                | 26.502              |
| Vibrational   | 61.422                  | 16.648               | 16.010              |

#### Input orientation:

| Center<br>Number | Atomic<br>Number | Atomic<br>Type | Coordinates (Angstroms) |           |           |
|------------------|------------------|----------------|-------------------------|-----------|-----------|
|                  |                  |                | X                       | Y         | Z         |
| 1                | 8                | 0              | 0.977520                | -0.944506 | -0.436018 |
| 2                | 6                | 0              | 1.981408                | -0.273136 | -0.094670 |
| 3                | 6                | 0              | 1.813419                | 1.221780  | 0.191372  |
| 4                | 1                | 0              | 2.437826                | 1.721203  | -0.570591 |
| 5                | 1                | 0              | 0.389574                | 2.660255  | 0.080153  |
| 6                | 1                | 0              | 0.016124                | 1.310844  | -0.759942 |
| 7                | 8                | 0              | 3.152114                | -0.724812 | 0.012127  |
| 8                | 7                | 0              | 0.418110                | 1.644124  | 0.111847  |
| 9                | 6                | 0              | 2.368656                | 1.582534  | 1.556883  |
| 10               | 1                | 0              | 3.440840                | 1.381913  | 1.621199  |
| 11               | 1                | 0              | 2.211335                | 2.647732  | 1.759630  |
| 12               | 1                | 0              | 1.860094                | 1.012357  | 2.343214  |

[Cu(Cys)(H<sub>2</sub>O)<sub>2</sub>]

Zero-point correction= 0.139966 (Hartree/Particle)  
Thermal correction to Energy= 0.153943  
Thermal correction to Enthalpy= 0.154887  
Thermal correction to Gibbs Free Energy= 0.098319  
Sum of electronic and zero-point Energies= -2513.859293  
Sum of electronic and thermal Energies= -2513.845316  
Sum of electronic and thermal Enthalpies= -2513.844371  
Sum of electronic and thermal Free Energies= -2513.900940

|               | E (Thermal)<br>KCal/Mol | CV<br>Cal/Mol-Kelvin | S<br>Cal/Mol-Kelvin |
|---------------|-------------------------|----------------------|---------------------|
| Total         | 96.601                  | 48.392               | 119.059             |
| Electronic    | 0.000                   | 0.000                | 1.377               |
| Translational | 0.889                   | 2.981                | 42.040              |
| Rotational    | 0.889                   | 2.981                | 31.246              |
| Vibrational   | 94.823                  | 42.431               | 44.395              |

Input orientation:

---

| Center<br>Number | Atomic<br>Number | Atomic<br>Type | Coordinates (Angstroms) |           |           |
|------------------|------------------|----------------|-------------------------|-----------|-----------|
|                  |                  |                | X                       | Y         | Z         |
| 1                | 7                | 0              | 0.378701                | -3.780694 | 0.218832  |
| 2                | 1                | 0              | 1.102909                | -3.769905 | 0.941373  |
| 3                | 6                | 0              | -0.066375               | -2.392748 | 0.006809  |
| 4                | 1                | 0              | -0.712190               | -2.376222 | -0.877528 |
| 5                | 6                | 0              | -0.863457               | -1.967725 | 1.224327  |
| 6                | 6                | 0              | 1.099637                | -1.418773 | -0.212148 |
| 7                | 1                | 0              | -0.194619               | -1.913037 | 2.093455  |
| 8                | 1                | 0              | -1.294075               | -0.975548 | 1.066848  |
| 9                | 16               | 0              | -2.225056               | -3.148837 | 1.560042  |
| 10               | 8                | 0              | 2.240676                | -1.781354 | 0.157738  |
| 11               | 29               | 0              | -1.116951               | -4.981112 | 0.793943  |
| 12               | 1                | 0              | 0.834612                | -4.134768 | -0.622481 |
| 13               | 8                | 0              | 0.795096                | -0.312151 | -0.717470 |
| 14               | 8                | 0              | -2.590859               | -6.223191 | 1.530469  |
| 15               | 1                | 0              | -2.312026               | -7.147492 | 1.564497  |
| 16               | 8                | 0              | -0.249208               | -6.608033 | -0.210532 |
| 17               | 1                | 0              | -0.420652               | -7.453832 | 0.221793  |
| 18               | 1                | 0              | 0.710545                | -6.563467 | -0.303857 |
| 19               | 1                | 0              | -2.824647               | -5.994463 | 2.439272  |

---

### Cysteine ligand

Zero-point correction= 0.085097 (Hartree/Particle)  
Thermal correction to Energy= 0.092474  
Thermal correction to Enthalpy= 0.093418  
Thermal correction to Gibbs Free Energy= 0.052458  
Sum of electronic and zero-point Energies= -720.837098  
Sum of electronic and thermal Energies= -720.829721  
Sum of electronic and thermal Enthalpies= -720.828777  
Sum of electronic and thermal Free Energies= -720.869737

|               | E (Thermal)<br>KCal/Mol | CV<br>Cal/Mol-Kelvin | S<br>Cal/Mol-Kelvin |
|---------------|-------------------------|----------------------|---------------------|
| Total         | 58.028                  | 25.113               | 86.207              |
| Electronic    | 0.000                   | 0.000                | 0.000               |
| Translational | 0.889                   | 2.981                | 40.237              |
| Rotational    | 0.889                   | 2.981                | 28.415              |
| Vibrational   | 56.251                  | 19.152               | 17.555              |

#### Input orientation:

| Center<br>Number | Atomic<br>Number | Atomic<br>Type | Coordinates (Angstroms) |           |           |
|------------------|------------------|----------------|-------------------------|-----------|-----------|
|                  |                  |                | X                       | Y         | Z         |
| 1                | 7                | 0              | 0.129714                | 1.867726  | -0.046913 |
| 2                | 1                | 0              | -0.090584               | 1.598113  | -1.005763 |
| 3                | 6                | 0              | 0.361641                | 0.634318  | 0.697619  |
| 4                | 1                | 0              | 0.827815                | 0.883538  | 1.660268  |
| 5                | 6                | 0              | -0.925755               | -0.145012 | 0.994404  |
| 6                | 6                | 0              | 1.307886                | -0.300475 | -0.048779 |
| 7                | 1                | 0              | -1.347126               | -0.478343 | 0.033279  |
| 8                | 1                | 0              | -0.665323               | -1.047089 | 1.562653  |
| 9                | 16               | 0              | -2.180069               | 0.834026  | 1.915256  |
| 10               | 8                | 0              | 2.009963                | -1.078215 | 0.651487  |
| 11               | 8                | 0              | 1.290214                | -0.281844 | -1.306316 |
| 12               | 1                | 0              | -0.732767               | 2.261141  | 0.340015  |

[Cu(DmgH)(H<sub>2</sub>O)<sub>2</sub>]<sup>+</sup>

Zero-point correction= 0.166548 (Hartree/Particle)  
Thermal correction to Energy= 0.182199  
Thermal correction to Enthalpy= 0.183143  
Thermal correction to Gibbs Free Energy= 0.123965  
Sum of electronic and zero-point Energies= -2209.368740  
Sum of electronic and thermal Energies= -2209.353090  
Sum of electronic and thermal Enthalpies= -2209.352146  
Sum of electronic and thermal Free Energies= -2209.411324

|               | E (Thermal)<br>KCal/Mol | CV<br>Cal/Mol-Kelvin | S<br>Cal/Mol-Kelvin |
|---------------|-------------------------|----------------------|---------------------|
| Total         | 114.332                 | 55.049               | 124.552             |
| Electronic    | 0.000                   | 0.000                | 1.377               |
| Translational | 0.889                   | 2.981                | 41.986              |
| Rotational    | 0.889                   | 2.981                | 30.997              |
| Vibrational   | 112.554                 | 49.087               | 50.191              |

Input orientation:

| Center<br>Number | Atomic<br>Number | Atomic<br>Type | Coordinates (Angstroms)<br>X Y Z |           |           |
|------------------|------------------|----------------|----------------------------------|-----------|-----------|
| 1                | 29               | 0              | -1.128484                        | -0.026504 | -0.037753 |
| 2                | 6                | 0              | 1.570123                         | 0.758757  | -0.009785 |
| 3                | 6                | 0              | 1.604046                         | -0.711426 | 0.003934  |
| 4                | 6                | 0              | 2.820604                         | 1.546017  | 0.032794  |
| 5                | 1                | 0              | 2.628540                         | 2.617150  | 0.028117  |
| 6                | 1                | 0              | 3.388719                         | 1.288313  | 0.932764  |
| 7                | 1                | 0              | 3.448443                         | 1.290300  | -0.827172 |
| 8                | 6                | 0              | 2.849407                         | -1.514043 | 0.040878  |
| 9                | 1                | 0              | 2.836360                         | -2.192830 | 0.901126  |
| 10               | 1                | 0              | 2.925095                         | -2.140705 | -0.855368 |
| 11               | 1                | 0              | 3.741047                         | -0.890450 | 0.103104  |
| 12               | 7                | 0              | 0.435354                         | -1.280319 | -0.013737 |
| 13               | 7                | 0              | 0.388438                         | 1.265614  | -0.055760 |
| 14               | 8                | 0              | 0.268984                         | 2.628950  | -0.055844 |
| 15               | 1                | 0              | -0.693575                        | 2.773600  | -0.060477 |
| 16               | 8                | 0              | 0.267757                         | -2.551277 | -0.002686 |
| 17               | 8                | 0              | -2.442352                        | 1.555014  | 0.096155  |
| 18               | 1                | 0              | -2.916125                        | 1.557464  | 0.938260  |
| 19               | 8                | 0              | -2.301644                        | -1.664166 | -0.089845 |
| 20               | 1                | 0              | -2.889189                        | -1.746526 | 0.671038  |
| 21               | 1                | 0              | -3.126118                        | 1.536664  | -0.586369 |
| 22               | 1                | 0              | -1.618677                        | -2.365213 | 0.002553  |

### Dimethylglyoxime ligand

Zero-point correction= 0.112706 (Hartree/Particle)  
Thermal correction to Energy= 0.121791  
Thermal correction to Enthalpy= 0.122735  
Thermal correction to Gibbs Free Energy= 0.078860  
Sum of electronic and zero-point Energies= -416.368783  
Sum of electronic and thermal Energies= -416.359698  
Sum of electronic and thermal Enthalpies= -416.358754  
Sum of electronic and thermal Free Energies= -416.402629

|               | E (Thermal)<br>KCal/Mol | CV<br>Cal/Mol-Kelvin | S<br>Cal/Mol-Kelvin |
|---------------|-------------------------|----------------------|---------------------|
| Total         | 76.425                  | 31.850               | 92.342              |
| Electronic    | 0.000                   | 0.000                | 0.000               |
| Translational | 0.889                   | 2.981                | 40.136              |
| Rotational    | 0.889                   | 2.981                | 28.447              |
| Vibrational   | 74.647                  | 25.888               | 23.758              |

#### Input orientation:

| Center<br>Number | Atomic<br>Number | Atomic<br>Type | Coordinates (Angstroms) |           |           |
|------------------|------------------|----------------|-------------------------|-----------|-----------|
|                  |                  |                | X                       | Y         | Z         |
| 1                | 6                | 0              | 2.378050                | -1.559385 | 0.042034  |
| 2                | 6                | 0              | 1.580980                | -2.779080 | 0.129041  |
| 3                | 6                | 0              | 3.847321                | -1.617332 | -0.209515 |
| 4                | 1                | 0              | 4.393362                | -1.181578 | 0.633938  |
| 5                | 1                | 0              | 4.181206                | -2.642255 | -0.354938 |
| 6                | 1                | 0              | 4.104883                | -1.022382 | -1.091427 |
| 7                | 6                | 0              | 0.112752                | -2.728089 | 0.387985  |
| 8                | 1                | 0              | -0.137363               | -3.256084 | 1.316334  |
| 9                | 1                | 0              | -0.251822               | -1.704083 | 0.465410  |
| 10               | 1                | 0              | -0.439973               | -3.236450 | -0.410989 |
| 11               | 7                | 0              | 2.214585                | -3.909893 | -0.024183 |
| 12               | 7                | 0              | 1.752873                | -0.439748 | 0.197452  |
| 13               | 8                | 0              | 2.632673                | 0.655253  | 0.098799  |
| 14               | 1                | 0              | 2.055096                | 1.417647  | 0.221600  |
| 15               | 8                | 0              | 1.491805                | -5.011159 | 0.062866  |

**[Cu(Hst)(H<sub>2</sub>O)<sub>2</sub>]<sup>2+</sup>**

Zero-point correction= 0.199723 (Hartree/Particle)  
Thermal correction to Energy= 0.213577  
Thermal correction to Enthalpy= 0.214521  
Thermal correction to Gibbs Free Energy= 0.159578  
Sum of electronic and zero-point Energies= -2152.905690  
Sum of electronic and thermal Energies= -2152.891836  
Sum of electronic and thermal Enthalpies= -2152.890891  
Sum of electronic and thermal Free Energies= -2152.945834

|               | E (Thermal)<br>KCal/Mol | CV<br>Cal/Mol-Kelvin | S<br>Cal/Mol-Kelvin |
|---------------|-------------------------|----------------------|---------------------|
| Total         | 134.021                 | 51.407               | 115.637             |
| Electronic    | 0.000                   | 0.000                | 1.377               |
| Translational | 0.889                   | 2.981                | 41.930              |
| Rotational    | 0.889                   | 2.981                | 30.904              |
| Vibrational   | 132.244                 | 45.445               | 41.426              |

Input orientation:

| Center<br>Number | Atomic<br>Number | Atomic<br>Type | Coordinates (Angstroms)<br>X Y Z |           |           |
|------------------|------------------|----------------|----------------------------------|-----------|-----------|
| 1                | 6                | 0              | -2.067585                        | -0.647606 | 0.161139  |
| 2                | 6                | 0              | -1.479166                        | 1.716888  | -0.317494 |
| 3                | 6                | 0              | -2.215090                        | 0.761055  | 0.602078  |
| 4                | 1                | 0              | -1.785125                        | 2.747935  | -0.112970 |
| 5                | 1                | 0              | -1.715818                        | 1.498574  | -1.362796 |
| 6                | 1                | 0              | -1.840262                        | 0.888243  | 1.627365  |
| 7                | 1                | 0              | -3.278296                        | 1.016413  | 0.619761  |
| 8                | 1                | 0              | 2.673555                         | -1.992189 | -0.341485 |
| 9                | 1                | 0              | 1.564414                         | -2.709136 | 0.450696  |
| 10               | 8                | 0              | 2.614140                         | 0.837204  | 0.021668  |
| 11               | 7                | 0              | -0.020746                        | 1.597140  | -0.140290 |
| 12               | 29               | 0              | 0.869066                         | -0.209411 | -0.037068 |
| 13               | 1                | 0              | 0.467458                         | 2.125029  | -0.863845 |
| 14               | 1                | 0              | 0.244335                         | 2.025671  | 0.748897  |
| 15               | 8                | 0              | 2.010238                         | -1.858900 | 0.348674  |
| 16               | 1                | 0              | 3.374570                         | 0.283363  | 0.242460  |
| 17               | 1                | 0              | 2.827077                         | 1.243584  | -0.828841 |
| 18               | 7                | 0              | -0.832217                        | -1.197681 | -0.124911 |
| 19               | 6                | 0              | -3.018741                        | -1.590133 | -0.077607 |
| 20               | 1                | 0              | -4.092202                        | -1.558123 | 0.018453  |
| 21               | 1                | 0              | -2.767852                        | -3.594970 | -0.778170 |
| 22               | 6                | 0              | -1.041768                        | -2.439656 | -0.529080 |
| 23               | 1                | 0              | -0.291185                        | -3.146916 | -0.848430 |
| 24               | 7                | 0              | -2.350066                        | -2.712506 | -0.507290 |

## Histamine ligand

Zero-point correction= 0.144566 (Hartree/Particle)  
Thermal correction to Energy= 0.152151  
Thermal correction to Enthalpy= 0.153095  
Thermal correction to Gibbs Free Energy= 0.112259  
Sum of electronic and zero-point Energies= -359.913591  
Sum of electronic and thermal Energies= -359.906005  
Sum of electronic and thermal Enthalpies= -359.905061  
Sum of electronic and thermal Free Energies= -359.945898

|               | E (Thermal)<br>KCal/Mol | CV<br>Cal/Mol-Kelvin | S<br>Cal/Mol-Kelvin |
|---------------|-------------------------|----------------------|---------------------|
| Total         | 95.476                  | 28.348               | 85.947              |
| Electronic    | 0.000                   | 0.000                | 0.000               |
| Translational | 0.889                   | 2.981                | 40.031              |
| Rotational    | 0.889                   | 2.981                | 28.119              |
| Vibrational   | 93.699                  | 22.387               | 17.797              |

### Input orientation:

| Center<br>Number | Atomic<br>Number | Atomic<br>Type | Coordinates (Angstroms) |           |           |
|------------------|------------------|----------------|-------------------------|-----------|-----------|
|                  |                  |                | X                       | Y         | Z         |
| 1                | 6                | 0              | -2.140659               | -0.590211 | -0.306978 |
| 2                | 6                | 0              | -1.398867               | 1.750549  | 0.242414  |
| 3                | 6                | 0              | -2.463502               | 0.861446  | -0.380275 |
| 4                | 1                | 0              | -1.254226               | 1.434187  | 1.288737  |
| 5                | 1                | 0              | -1.770672               | 2.780622  | 0.275732  |
| 6                | 1                | 0              | -3.409735               | 1.034684  | 0.145205  |
| 7                | 1                | 0              | -2.615029               | 1.159949  | -1.426359 |
| 8                | 7                | 0              | -0.161583               | 1.728494  | -0.533967 |
| 9                | 1                | 0              | 0.566921                | 2.214788  | -0.018580 |
| 10               | 1                | 0              | 0.148433                | 0.762861  | -0.625670 |
| 11               | 7                | 0              | -1.213796               | -1.196543 | -1.134744 |
| 12               | 6                | 0              | -2.649182               | -1.510997 | 0.565073  |
| 13               | 1                | 0              | -3.386160               | -1.428690 | 1.349415  |
| 14               | 1                | 0              | -2.172056               | -3.590260 | 0.719724  |
| 15               | 6                | 0              | -1.175917               | -2.454943 | -0.755319 |
| 16               | 1                | 0              | -0.557981               | -3.229956 | -1.186688 |
| 17               | 7                | 0              | -2.023672               | -2.697638 | 0.266931  |



[Cu(His)(H<sub>2</sub>O)<sub>2</sub>]<sup>+</sup>

Zero-point correction= 0.202823 (Hartree/Particle)  
Thermal correction to Energy= 0.218747  
Thermal correction to Enthalpy= 0.219691  
Thermal correction to Gibbs Free Energy= 0.159352  
Sum of electronic and zero-point Energies= -2341.006986  
Sum of electronic and thermal Energies= -2340.991062  
Sum of electronic and thermal Enthalpies= -2340.990118  
Sum of electronic and thermal Free Energies= -2341.050457

|               | E (Thermal)<br>KCal/Mol | CV<br>Cal/Mol-Kelvin | S<br>Cal/Mol-Kelvin |
|---------------|-------------------------|----------------------|---------------------|
| Total         | 137.266                 | 59.061               | 126.995             |
| Electronic    | 0.000                   | 0.000                | 1.377               |
| Translational | 0.889                   | 2.981                | 42.485              |
| Rotational    | 0.889                   | 2.981                | 32.544              |
| Vibrational   | 135.488                 | 53.099               | 50.588              |

Input orientation:

| Center<br>Number | Atomic<br>Number | Atomic<br>Type | Coordinates (Angstroms)<br>X Y Z |           |           |
|------------------|------------------|----------------|----------------------------------|-----------|-----------|
| 1                | 6                | 0              | -2.086280                        | -0.650499 | 0.161198  |
| 2                | 6                | 0              | -1.497651                        | 1.720794  | -0.386187 |
| 3                | 6                | 0              | -2.257474                        | 0.773600  | 0.536218  |
| 4                | 1                | 0              | -1.707594                        | 1.469002  | -1.430641 |
| 5                | 1                | 0              | -1.916670                        | 0.950456  | 1.567324  |
| 6                | 1                | 0              | -3.323862                        | 1.014854  | 0.504434  |
| 7                | 1                | 0              | 2.696406                         | -1.879543 | -0.557490 |
| 8                | 1                | 0              | 1.670395                         | -2.724464 | 0.219281  |
| 9                | 8                | 0              | 2.582890                         | 0.880283  | 0.036232  |
| 10               | 7                | 0              | -0.050722                        | 1.584896  | -0.159456 |
| 11               | 29               | 0              | 0.857908                         | -0.201047 | -0.021798 |
| 12               | 1                | 0              | 0.453752                         | 2.103101  | -0.880815 |
| 13               | 1                | 0              | 0.165884                         | 2.072771  | 0.715254  |
| 14               | 8                | 0              | 2.063094                         | -1.844560 | 0.171597  |
| 15               | 1                | 0              | 3.354006                         | 0.336902  | 0.246854  |
| 16               | 1                | 0              | 2.778070                         | 1.285631  | -0.819467 |
| 17               | 7                | 0              | -0.847194                        | -1.212222 | -0.088047 |
| 18               | 6                | 0              | -3.034188                        | -1.610027 | -0.013291 |
| 19               | 1                | 0              | -4.107492                        | -1.574943 | 0.082137  |
| 20               | 1                | 0              | -2.774457                        | -3.655544 | -0.580959 |
| 21               | 6                | 0              | -1.054905                        | -2.479576 | -0.404647 |
| 22               | 1                | 0              | -0.308654                        | -3.207877 | -0.681355 |
| 23               | 7                | 0              | -2.361740                        | -2.755778 | -0.365593 |
| 24               | 6                | 0              | -1.978121                        | 3.158745  | -0.118029 |
| 25               | 8                | 0              | -1.266963                        | 3.873214  | 0.624157  |
| 26               | 8                | 0              | -3.070390                        | 3.473984  | -0.642355 |

## Histidine ligand

Zero-point correction= 0.146989 (Hartree/Particle)  
Thermal correction to Energy= 0.157046  
Thermal correction to Enthalpy= 0.157990  
Thermal correction to Gibbs Free Energy= 0.109869  
Sum of electronic and zero-point Energies= -548.013563  
Sum of electronic and thermal Energies= -548.003506  
Sum of electronic and thermal Enthalpies= -548.002562  
Sum of electronic and thermal Free Energies= -548.050683

|               | E (Thermal)<br>KCal/Mol | CV<br>Cal/Mol-Kelvin | S<br>Cal/Mol-Kelvin |
|---------------|-------------------------|----------------------|---------------------|
| Total         | 98.548                  | 36.569               | 101.281             |
| Electronic    | 0.000                   | 0.000                | 0.000               |
| Translational | 0.889                   | 2.981                | 41.006              |
| Rotational    | 0.889                   | 2.981                | 30.294              |
| Vibrational   | 96.770                  | 30.608               | 29.981              |

### Input orientation:

| Center<br>Number | Atomic<br>Number | Atomic<br>Type | Coordinates (Angstroms) |           |           |
|------------------|------------------|----------------|-------------------------|-----------|-----------|
|                  |                  |                | X                       | Y         | Z         |
| 1                | 6                | 0              | -2.181354               | 0.856797  | 1.849593  |
| 2                | 6                | 0              | -1.303633               | 1.411067  | -0.460184 |
| 3                | 6                | 0              | -2.412410               | 0.773924  | 0.381399  |
| 4                | 1                | 0              | -0.350066               | 0.941723  | -0.184758 |
| 5                | 1                | 0              | -3.361053               | 1.272468  | 0.137833  |
| 6                | 1                | 0              | -2.517971               | -0.274262 | 0.076547  |
| 7                | 7                | 0              | -1.217112               | 2.835386  | -0.168837 |
| 8                | 1                | 0              | -0.522453               | 3.253603  | -0.783736 |
| 9                | 1                | 0              | -2.102759               | 3.263431  | -0.436046 |
| 10               | 7                | 0              | -2.980006               | 1.606573  | 2.688200  |
| 11               | 6                | 0              | -1.191955               | 0.253171  | 2.573424  |
| 12               | 1                | 0              | -0.384122               | -0.402897 | 2.286457  |
| 13               | 1                | 0              | -0.838465               | 0.364755  | 4.678052  |
| 14               | 6                | 0              | -2.473258               | 1.447743  | 3.892162  |
| 15               | 1                | 0              | -2.847073               | 1.892273  | 4.803522  |
| 16               | 7                | 0              | -1.390105               | 0.642304  | 3.876356  |
| 17               | 6                | 0              | -1.578388               | 1.050733  | -1.927698 |
| 18               | 8                | 0              | -2.182974               | 1.888184  | -2.641905 |
| 19               | 8                | 0              | -1.205960               | -0.091768 | -2.302360 |

[Cu(i-Val)(H<sub>2</sub>O)<sub>3</sub>]<sup>+</sup>

Zero-point correction= 0.185694 (Hartree/Particle)  
Thermal correction to Energy= 0.200649  
Thermal correction to Enthalpy= 0.201593  
Thermal correction to Gibbs Free Energy= 0.142369  
Sum of electronic and zero-point Energies= -2139.299551  
Sum of electronic and thermal Energies= -2139.284596  
Sum of electronic and thermal Enthalpies= -2139.283652  
Sum of electronic and thermal Free Energies= -2139.342877

|               | E (Thermal)<br>KCal/Mol | CV<br>Cal/Mol-Kelvin | S<br>Cal/Mol-Kelvin |
|---------------|-------------------------|----------------------|---------------------|
| Total         | 125.909                 | 52.004               | 124.649             |
| Electronic    | 0.000                   | 0.000                | 1.377               |
| Translational | 0.889                   | 2.981                | 41.784              |
| Rotational    | 0.889                   | 2.981                | 30.974              |
| Vibrational   | 124.132                 | 46.042               | 50.513              |

Input orientation:

| Center<br>Number | Atomic<br>Number | Atomic<br>Type | Coordinates (Angstroms)<br>X Y Z |           |           |
|------------------|------------------|----------------|----------------------------------|-----------|-----------|
| 1                | 6                | 0              | -2.110706                        | -0.306760 | -0.860070 |
| 2                | 1                | 0              | -2.347329                        | -1.374109 | -0.943915 |
| 3                | 1                | 0              | -2.276211                        | 0.151392  | -1.844060 |
| 4                | 6                | 0              | -3.016257                        | 0.354450  | 0.179755  |
| 5                | 1                | 0              | -2.752860                        | 1.420290  | 0.229633  |
| 6                | 6                | 0              | -4.464637                        | 0.226753  | -0.256398 |
| 7                | 1                | 0              | -4.750451                        | -0.830412 | -0.332701 |
| 8                | 1                | 0              | -5.136444                        | 0.702533  | 0.465647  |
| 9                | 1                | 0              | -4.634136                        | 0.690944  | -1.234092 |
| 10               | 6                | 0              | -2.804321                        | -0.272151 | 1.547557  |
| 11               | 1                | 0              | -1.771316                        | -0.159766 | 1.897728  |
| 12               | 1                | 0              | -3.459131                        | 0.185364  | 2.296516  |
| 13               | 1                | 0              | -3.032198                        | -1.345825 | 1.514240  |
| 14               | 6                | 0              | -0.663101                        | -0.159737 | -0.550466 |
| 15               | 8                | 0              | -0.139800                        | 0.978845  | -0.353792 |
| 16               | 8                | 0              | 0.108179                         | -1.168686 | -0.485864 |
| 17               | 29               | 0              | 1.652234                         | 0.029627  | -0.100637 |
| 18               | 8                | 0              | 2.878894                         | 1.608464  | 0.157779  |
| 19               | 1                | 0              | 3.583310                         | 1.398453  | 0.785327  |
| 20               | 8                | 0              | 3.088523                         | -1.338138 | 0.237300  |
| 21               | 1                | 0              | 2.867563                         | -2.157068 | -0.226267 |
| 22               | 1                | 0              | 2.379498                         | 2.332789  | 0.558139  |
| 23               | 1                | 0              | 3.941840                         | -1.055507 | -0.118011 |

### i-Valeric acid ligand

Zero-point correction= 0.132834 (Hartree/Particle)  
Thermal correction to Energy= 0.140698  
Thermal correction to Enthalpy= 0.141642  
Thermal correction to Gibbs Free Energy= 0.100485  
Sum of electronic and zero-point Energies= -346.325072  
Sum of electronic and thermal Energies= -346.317207  
Sum of electronic and thermal Enthalpies= -346.316263  
Sum of electronic and thermal Free Energies= -346.357420

|               | E (Thermal)<br>KCal/Mol | CV<br>Cal/Mol-Kelvin | S<br>Cal/Mol-Kelvin |
|---------------|-------------------------|----------------------|---------------------|
| Total         | 88.289                  | 27.859               | 86.623              |
| Electronic    | 0.000                   | 0.000                | 0.000               |
| Translational | 0.889                   | 2.981                | 39.749              |
| Rotational    | 0.889                   | 2.981                | 27.718              |
| Vibrational   | 86.512                  | 21.898               | 19.155              |

#### Input orientation:

| Center<br>Number | Atomic<br>Number | Atomic<br>Type | Coordinates (Angstroms) |           |           |
|------------------|------------------|----------------|-------------------------|-----------|-----------|
|                  |                  |                | X                       | Y         | Z         |
| 1                | 6                | 0              | 0.530323                | 0.303110  | 0.027114  |
| 2                | 1                | 0              | 0.913484                | -0.724061 | -0.037373 |
| 3                | 1                | 0              | 0.874243                | 0.842358  | -0.865770 |
| 4                | 6                | 0              | -0.997169               | 0.267264  | 0.035340  |
| 5                | 1                | 0              | -1.359668               | 1.305185  | 0.070355  |
| 6                | 6                | 0              | -1.512748               | -0.384590 | -1.235926 |
| 7                | 1                | 0              | -1.165213               | -1.424301 | -1.302532 |
| 8                | 1                | 0              | -2.608162               | -0.399518 | -1.261606 |
| 9                | 1                | 0              | -1.160398               | 0.141513  | -2.130285 |
| 10               | 6                | 0              | -1.513058               | -0.468280 | 1.261801  |
| 11               | 1                | 0              | -1.196735               | 0.014228  | 2.194196  |
| 12               | 1                | 0              | -2.607760               | -0.514314 | 1.267094  |
| 13               | 1                | 0              | -1.135364               | -1.499904 | 1.275569  |
| 14               | 6                | 0              | 1.110547                | 0.993446  | 1.251544  |
| 15               | 8                | 0              | 0.806825                | 2.204200  | 1.424385  |
| 16               | 8                | 0              | 1.848152                | 0.323107  | 2.021784  |

**[Cu(Lct)(H<sub>2</sub>O)<sub>2</sub>]<sup>+</sup>**

Zero-point correction= 0.135499 (Hartree/Particle)  
Thermal correction to Energy= 0.148466  
Thermal correction to Enthalpy= 0.149410  
Thermal correction to Gibbs Free Energy= 0.095809  
Sum of electronic and zero-point Energies= -2135.990478  
Sum of electronic and thermal Energies= -2135.977511  
Sum of electronic and thermal Enthalpies= -2135.976567  
Sum of electronic and thermal Free Energies= -2136.030168

|               | E (Thermal)<br>KCal/Mol | CV<br>Cal/Mol-Kelvin | S<br>Cal/Mol-Kelvin |
|---------------|-------------------------|----------------------|---------------------|
| Total         | 93.164                  | 45.289               | 112.813             |
| Electronic    | 0.000                   | 0.000                | 1.377               |
| Translational | 0.889                   | 2.981                | 41.599              |
| Rotational    | 0.889                   | 2.981                | 30.004              |
| Vibrational   | 91.387                  | 39.327               | 39.833              |

Input orientation:

| Center<br>Number | Atomic<br>Number | Atomic<br>Type | Coordinates (Angstroms)<br>X Y Z |           |           |
|------------------|------------------|----------------|----------------------------------|-----------|-----------|
| 1                | 6                | 0              | 2.689882                         | -1.210107 | 0.750917  |
| 2                | 1                | 0              | 3.676149                         | -0.741025 | 0.740114  |
| 3                | 1                | 0              | 2.227370                         | -1.032050 | 1.727262  |
| 4                | 1                | 0              | 2.816917                         | -2.286617 | 0.612518  |
| 5                | 6                | 0              | 1.828526                         | -0.644887 | -0.351185 |
| 6                | 1                | 0              | 2.283997                         | -0.821803 | -1.331626 |
| 7                | 6                | 0              | 1.642426                         | 0.859411  | -0.210771 |
| 8                | 8                | 0              | 2.642662                         | 1.574626  | -0.197129 |
| 9                | 8                | 0              | 0.442201                         | 1.305713  | -0.115458 |
| 10               | 8                | 0              | 0.541180                         | -1.297045 | -0.322985 |
| 11               | 1                | 0              | 0.417532                         | -1.822227 | -1.124474 |
| 12               | 29               | 0              | -0.970910                        | 0.006234  | -0.105759 |
| 13               | 8                | 0              | -2.375191                        | 1.424447  | 0.295801  |
| 14               | 8                | 0              | -2.366620                        | -1.417539 | -0.153090 |
| 15               | 1                | 0              | -2.056187                        | -2.223825 | 0.280498  |
| 16               | 1                | 0              | -3.159508                        | 1.312972  | -0.257712 |
| 17               | 1                | 0              | -3.166337                        | -1.153452 | 0.321611  |
| 18               | 1                | 0              | -2.022962                        | 2.298007  | 0.078051  |

### Lactic acid ligand

Zero-point correction= 0.081822 (Hartree/Particle)  
Thermal correction to Energy= 0.088182  
Thermal correction to Enthalpy= 0.089127  
Thermal correction to Gibbs Free Energy= 0.051652  
Sum of electronic and zero-point Energies= -343.012942  
Sum of electronic and thermal Energies= -343.006581  
Sum of electronic and thermal Enthalpies= -343.005637  
Sum of electronic and thermal Free Energies= -343.043111

|               | E (Thermal)<br>KCal/Mol | CV<br>Cal/Mol-Kelvin | S<br>Cal/Mol-Kelvin |
|---------------|-------------------------|----------------------|---------------------|
| Total         | 55.335                  | 21.730               | 78.871              |
| Electronic    | 0.000                   | 0.000                | 0.000               |
| Translational | 0.889                   | 2.981                | 39.371              |
| Rotational    | 0.889                   | 2.981                | 26.460              |
| Vibrational   | 53.558                  | 15.768               | 13.040              |

#### Input orientation:

| Center<br>Number | Atomic<br>Number | Atomic<br>Type | Coordinates (Angstroms) |           |           |
|------------------|------------------|----------------|-------------------------|-----------|-----------|
|                  |                  |                | X                       | Y         | Z         |
| 1                | 6                | 0              | -0.883515               | 1.061457  | -1.464609 |
| 2                | 1                | 0              | -0.675812               | 2.043855  | -1.031479 |
| 3                | 1                | 0              | -0.245918               | 0.923155  | -2.345585 |
| 4                | 1                | 0              | -1.929090               | 1.047653  | -1.790616 |
| 5                | 6                | 0              | -0.629624               | -0.043449 | -0.456740 |
| 6                | 1                | 0              | -1.226386               | 0.137381  | 0.448729  |
| 7                | 6                | 0              | 0.844200                | -0.023863 | -0.046185 |
| 8                | 8                | 0              | 1.619805                | -0.871501 | -0.544443 |
| 9                | 8                | 0              | 1.165920                | 0.895806  | 0.748222  |
| 10               | 8                | 0              | -0.962176               | -1.312977 | -1.004476 |
| 11               | 1                | 0              | -1.880446               | -1.274301 | -1.294557 |

**[Cu(Leu)(H<sub>2</sub>O)<sub>2</sub>]<sup>+</sup>**

Zero-point correction= 0.233908 (Hartree/Particle)  
Thermal correction to Energy= 0.250165  
Thermal correction to Enthalpy= 0.251109  
Thermal correction to Gibbs Free Energy= 0.191215  
Sum of electronic and zero-point Energies= -2233.900448  
Sum of electronic and thermal Energies= -2233.884191  
Sum of electronic and thermal Enthalpies= -2233.883247  
Sum of electronic and thermal Free Energies= -2233.943141

|               | E (Thermal)<br>KCal/Mol | CV<br>Cal/Mol-Kelvin | S<br>Cal/Mol-Kelvin |
|---------------|-------------------------|----------------------|---------------------|
| Total         | 156.981                 | 60.229               | 126.058             |
| Electronic    | 0.000                   | 0.000                | 1.377               |
| Translational | 0.889                   | 2.981                | 42.188              |
| Rotational    | 0.889                   | 2.981                | 31.856              |
| Vibrational   | 155.203                 | 54.267               | 50.636              |

Input orientation:

| Center<br>Number | Atomic<br>Number | Atomic<br>Type | Coordinates (Angstroms) |           |           |
|------------------|------------------|----------------|-------------------------|-----------|-----------|
|                  |                  |                | X                       | Y         | Z         |
| 1                | 8                | 0              | 1.048022                | -1.025050 | -0.224797 |
| 2                | 6                | 0              | 2.093958                | -0.320496 | -0.478686 |
| 3                | 6                | 0              | 1.962261                | 1.172833  | -0.211233 |
| 4                | 1                | 0              | 2.631584                | 1.709830  | -0.892610 |
| 5                | 1                | 0              | 0.323094                | 2.420928  | 0.023127  |
| 6                | 1                | 0              | 0.390325                | 1.697027  | -1.450800 |
| 7                | 8                | 0              | 3.155788                | -0.790541 | -0.886309 |
| 8                | 7                | 0              | 0.555652                | 1.550514  | -0.455214 |
| 9                | 29               | 0              | -0.578926               | 0.016307  | 0.118551  |
| 10               | 8                | 0              | -2.200671               | 1.194225  | 0.446678  |
| 11               | 1                | 0              | -2.935477               | 0.711573  | 0.848983  |
| 12               | 8                | 0              | -1.690692               | -1.665057 | 0.398314  |
| 13               | 1                | 0              | -2.286410               | -1.586284 | 1.154883  |
| 14               | 1                | 0              | -1.998852               | 1.916674  | 1.056231  |
| 15               | 1                | 0              | -1.115201               | -2.415837 | 0.596037  |
| 16               | 6                | 0              | 2.310846                | 1.536362  | 1.229942  |
| 17               | 1                | 0              | 2.161385                | 2.621797  | 1.309582  |
| 18               | 1                | 0              | 1.572430                | 1.070685  | 1.901822  |
| 19               | 6                | 0              | 3.724695                | 1.177036  | 1.692419  |
| 20               | 1                | 0              | 4.391485                | 1.190488  | 0.817016  |
| 21               | 6                | 0              | 4.223520                | 2.213601  | 2.686865  |
| 22               | 1                | 0              | 3.546932                | 2.271687  | 3.550037  |
| 23               | 1                | 0              | 5.219673                | 1.956094  | 3.063027  |
| 24               | 1                | 0              | 4.276735                | 3.211102  | 2.237658  |
| 25               | 6                | 0              | 3.774774                | -0.205647 | 2.327842  |
| 26               | 1                | 0              | 3.384615                | -0.991321 | 1.672930  |
| 27               | 1                | 0              | 4.801551                | -0.478379 | 2.595591  |
| 28               | 1                | 0              | 3.177037                | -0.214157 | 3.249058  |

## Leucine ligand

Zero-point correction= 0.178556 (Hartree/Particle)  
Thermal correction to Energy= 0.189027  
Thermal correction to Enthalpy= 0.189971  
Thermal correction to Gibbs Free Energy= 0.142294  
Sum of electronic and zero-point Energies= -440.911144  
Sum of electronic and thermal Energies= -440.900673  
Sum of electronic and thermal Enthalpies= -440.899729  
Sum of electronic and thermal Free Energies= -440.947406

|               | E (Thermal)<br>KCal/Mol | CV<br>Cal/Mol-Kelvin | S<br>Cal/Mol-Kelvin |
|---------------|-------------------------|----------------------|---------------------|
| Total         | 118.616                 | 37.662               | 100.346             |
| Electronic    | 0.000                   | 0.000                | 0.000               |
| Translational | 0.889                   | 2.981                | 40.502              |
| Rotational    | 0.889                   | 2.981                | 29.470              |
| Vibrational   | 116.839                 | 31.700               | 30.374              |

### Input orientation:

| Center<br>Number | Atomic<br>Number | Atomic<br>Type | Coordinates (Angstroms) |           |           |
|------------------|------------------|----------------|-------------------------|-----------|-----------|
|                  |                  |                | X                       | Y         | Z         |
| 1                | 8                | 0              | 0.983803                | -1.038065 | 0.087464  |
| 2                | 6                | 0              | 2.057780                | -0.391335 | 0.168191  |
| 3                | 6                | 0              | 1.994959                | 1.140746  | 0.087878  |
| 4                | 1                | 0              | 2.895474                | 1.461305  | -0.452734 |
| 5                | 1                | 0              | 0.715006                | 1.184627  | -1.484372 |
| 6                | 1                | 0              | 0.002175                | 1.436247  | -0.056332 |
| 7                | 8                | 0              | 3.197427                | -0.897833 | 0.345467  |
| 8                | 7                | 0              | 0.828027                | 1.679223  | -0.602334 |
| 9                | 6                | 0              | 2.056419                | 1.671541  | 1.517012  |
| 10               | 1                | 0              | 1.181090                | 1.280040  | 2.061249  |
| 11               | 1                | 0              | 2.943931                | 1.245068  | 2.007971  |
| 12               | 6                | 0              | 2.101237                | 3.188003  | 1.677476  |
| 13               | 1                | 0              | 1.185300                | 3.612987  | 1.243195  |
| 14               | 6                | 0              | 2.132517                | 3.538370  | 3.156690  |
| 15               | 1                | 0              | 3.048104                | 3.151167  | 3.623851  |
| 16               | 1                | 0              | 2.113560                | 4.622995  | 3.311835  |
| 17               | 1                | 0              | 1.278760                | 3.107248  | 3.692026  |
| 18               | 6                | 0              | 3.298944                | 3.797277  | 0.968201  |
| 19               | 1                | 0              | 3.264499                | 3.648193  | -0.116146 |
| 20               | 1                | 0              | 3.355453                | 4.876736  | 1.149309  |
| 21               | 1                | 0              | 4.232192                | 3.349303  | 1.336968  |



[Cu(ox)(H<sub>2</sub>O)<sub>2</sub>]

Zero-point correction= 0.077244 (Hartree/Particle)  
Thermal correction to Energy= 0.088822  
Thermal correction to Enthalpy= 0.089767  
Thermal correction to Gibbs Free Energy= 0.039098  
Sum of electronic and zero-point Energies= -2170.354359  
Sum of electronic and thermal Energies= -2170.342780  
Sum of electronic and thermal Enthalpies= -2170.341836  
Sum of electronic and thermal Free Energies= -2170.392504

|               | E (Thermal)<br>KCal/Mol | CV<br>Cal/Mol-Kelvin | S<br>Cal/Mol-Kelvin |
|---------------|-------------------------|----------------------|---------------------|
| Total         | 55.737                  | 39.185               | 106.642             |
| Electronic    | 0.000                   | 0.000                | 1.377               |
| Translational | 0.889                   | 2.981                | 41.583              |
| Rotational    | 0.889                   | 2.981                | 29.838              |
| Vibrational   | 53.959                  | 33.224               | 33.843              |

Input orientation:

| Center<br>Number | Atomic<br>Number | Atomic<br>Type | Coordinates (Angstroms) |           |           |
|------------------|------------------|----------------|-------------------------|-----------|-----------|
|                  |                  |                | X                       | Y         | Z         |
| 1                | 6                | 0              | 1.989901                | 1.472882  | 0.019614  |
| 2                | 8                | 0              | 3.207974                | 1.337959  | 0.002953  |
| 3                | 8                | 0              | 1.366412                | 2.590718  | 0.017699  |
| 4                | 6                | 0              | 1.076169                | 0.216532  | 0.046403  |
| 5                | 8                | 0              | -0.179524               | 0.464480  | 0.033894  |
| 6                | 8                | 0              | 1.580088                | -0.900330 | 0.076397  |
| 7                | 29               | 0              | -0.564450               | 2.370118  | 0.016583  |
| 8                | 8                | 0              | -2.563659               | 2.086310  | 0.032764  |
| 9                | 8                | 0              | -0.862742               | 4.358530  | -0.017082 |
| 10               | 1                | 0              | -0.050251               | 4.827748  | 0.214599  |
| 11               | 1                | 0              | -1.519602               | 4.629981  | 0.637136  |
| 12               | 1                | 0              | -2.760920               | 1.140016  | 0.023999  |
| 13               | 1                | 0              | -2.963470               | 2.441464  | -0.772037 |

### Oxalic acid ligand

Zero-point correction= 0.023771 (Hartree/Particle)  
Thermal correction to Energy= 0.028690  
Thermal correction to Enthalpy= 0.029634  
Thermal correction to Gibbs Free Energy= -0.005430  
Sum of electronic and zero-point Energies= -377.361692  
Sum of electronic and thermal Energies= -377.356773  
Sum of electronic and thermal Enthalpies= -377.355829  
Sum of electronic and thermal Free Energies= -377.390893

|               | E (Thermal)<br>KCal/Mol | CV<br>Cal/Mol-Kelvin | S<br>Cal/Mol-Kelvin |
|---------------|-------------------------|----------------------|---------------------|
| Total         | 18.003                  | 15.313               | 73.798              |
| Electronic    | 0.000                   | 0.000                | 0.000               |
| Translational | 0.889                   | 2.981                | 39.336              |
| Rotational    | 0.889                   | 2.981                | 26.126              |
| Vibrational   | 16.226                  | 9.351                | 8.336               |

#### Input orientation:

| Center<br>Number | Atomic<br>Number | Atomic<br>Type | Coordinates (Angstroms) |           |           |
|------------------|------------------|----------------|-------------------------|-----------|-----------|
|                  |                  |                | X                       | Y         | Z         |
| 1                | 6                | 0              | 1.840862                | 1.537159  | -0.000022 |
| 2                | 8                | 0              | 3.076996                | 1.389192  | -0.141596 |
| 3                | 8                | 0              | 1.241136                | 2.628234  | 0.141543  |
| 4                | 6                | 0              | 0.962010                | 0.235488  | 0.000031  |
| 5                | 8                | 0              | -0.274131               | 0.383453  | -0.141452 |
| 6                | 8                | 0              | 1.561724                | -0.855562 | 0.141835  |

[Cu(Slh)(H<sub>2</sub>O)<sub>2</sub>]<sup>+</sup>

Zero-point correction= 0.155567 (Hartree/Particle)  
Thermal correction to Energy= 0.168590  
Thermal correction to Enthalpy= 0.169534  
Thermal correction to Gibbs Free Energy= 0.116764  
Sum of electronic and zero-point Energies= -2213.068917  
Sum of electronic and thermal Energies= -2213.055893  
Sum of electronic and thermal Enthalpies= -2213.054949  
Sum of electronic and thermal Free Energies= -2213.107720

|               | E (Thermal)<br>KCal/Mol | CV<br>Cal/Mol-Kelvin | S<br>Cal/Mol-Kelvin |
|---------------|-------------------------|----------------------|---------------------|
| Total         | 105.792                 | 49.811               | 111.065             |
| Electronic    | 0.000                   | 0.000                | 1.377               |
| Translational | 0.889                   | 2.981                | 42.068              |
| Rotational    | 0.889                   | 2.981                | 31.362              |
| Vibrational   | 104.014                 | 43.850               | 36.258              |

Input orientation:

---

| Center<br>Number | Atomic<br>Number | Atomic<br>Type | Coordinates (Angstroms)<br>X Y Z |           |           |
|------------------|------------------|----------------|----------------------------------|-----------|-----------|
| 1                | 6                | 0              | 0.307079                         | -0.492752 | 0.446474  |
| 2                | 6                | 0              | 1.521333                         | -0.600725 | -0.184730 |
| 3                | 6                | 0              | 2.245784                         | 0.547429  | -0.587922 |
| 4                | 6                | 0              | 1.651476                         | 1.817916  | -0.310869 |
| 5                | 6                | 0              | 0.398622                         | 1.888967  | 0.343847  |
| 6                | 6                | 0              | -0.273325                        | 0.758863  | 0.722120  |
| 7                | 1                | 0              | -0.217068                        | -1.398559 | 0.739129  |
| 8                | 1                | 0              | 1.960351                         | -1.571940 | -0.392595 |
| 9                | 1                | 0              | -0.019018                        | 2.874036  | 0.538564  |
| 10               | 1                | 0              | -1.232953                        | 0.820725  | 1.222551  |
| 11               | 8                | 0              | 3.387822                         | 0.387190  | -1.174717 |
| 12               | 6                | 0              | 2.257354                         | 3.048026  | -0.669863 |
| 13               | 8                | 0              | 3.343966                         | 3.226102  | -1.254327 |
| 14               | 1                | 0              | 1.693409                         | 3.953970  | -0.398013 |
| 15               | 29               | 0              | 4.543383                         | 1.776394  | -1.808784 |
| 16               | 8                | 0              | 5.828761                         | 0.338245  | -2.424613 |
| 17               | 1                | 0              | 6.751075                         | 0.615136  | -2.352430 |
| 18               | 8                | 0              | 5.860031                         | 3.153420  | -2.523645 |
| 19               | 1                | 0              | 6.201419                         | 3.658781  | -1.773501 |
| 20               | 1                | 0              | 5.369820                         | 3.797851  | -3.052313 |
| 21               | 1                | 0              | 5.742995                         | -0.454615 | -1.879578 |

---

### Salicylaldehyde ligand

Zero-point correction= 0.100334 (Hartree/Particle)  
Thermal correction to Energy= 0.107526  
Thermal correction to Enthalpy= 0.108470  
Thermal correction to Gibbs Free Energy= 0.068445  
Sum of electronic and zero-point Energies= -420.081665  
Sum of electronic and thermal Energies= -420.074474  
Sum of electronic and thermal Enthalpies= -420.073529  
Sum of electronic and thermal Free Energies= -420.113554

|               | E (Thermal)<br>KCal/Mol | CV<br>Cal/Mol-Kelvin | S<br>Cal/Mol-Kelvin |
|---------------|-------------------------|----------------------|---------------------|
| Total         | 67.473                  | 27.018               | 84.239              |
| Electronic    | 0.000                   | 0.000                | 0.000               |
| Translational | 0.889                   | 2.981                | 40.287              |
| Rotational    | 0.889                   | 2.981                | 28.716              |
| Vibrational   | 65.696                  | 21.057               | 15.236              |

#### Input orientation:

| Center<br>Number | Atomic<br>Number | Atomic<br>Type | Coordinates (Angstroms) |           |           |
|------------------|------------------|----------------|-------------------------|-----------|-----------|
|                  |                  |                | X                       | Y         | Z         |
| 1                | 6                | 0              | 0.506932                | -0.473805 | 0.004641  |
| 2                | 6                | 0              | 1.876218                | -0.490101 | 0.047104  |
| 3                | 6                | 0              | 2.655253                | 0.714317  | 0.044768  |
| 4                | 6                | 0              | 1.897391                | 1.940466  | -0.005238 |
| 5                | 6                | 0              | 0.487951                | 1.915480  | -0.048083 |
| 6                | 6                | 0              | -0.214489               | 0.737859  | -0.043992 |
| 7                | 1                | 0              | -0.035917               | -1.416483 | 0.008615  |
| 8                | 1                | 0              | 2.418230                | -1.432477 | 0.084289  |
| 9                | 1                | 0              | -0.037307               | 2.867386  | -0.084848 |
| 10               | 1                | 0              | -1.298995               | 0.730845  | -0.077465 |
| 11               | 8                | 0              | 3.928475                | 0.674377  | 0.083723  |
| 12               | 6                | 0              | 2.587606                | 3.198176  | -0.011441 |
| 13               | 8                | 0              | 2.058663                | 4.313446  | -0.052717 |
| 14               | 1                | 0              | 3.690987                | 3.130017  | 0.024855  |

[Cu(Src)(H<sub>2</sub>O)<sub>2</sub>]<sup>+</sup>

Zero-point correction= 0.149489 (Hartree/Particle)  
Thermal correction to Energy= 0.162034  
Thermal correction to Enthalpy= 0.162978  
Thermal correction to Gibbs Free Energy= 0.110902  
Sum of electronic and zero-point Energies= -2116.099438  
Sum of electronic and thermal Energies= -2116.086893  
Sum of electronic and thermal Enthalpies= -2116.085948  
Sum of electronic and thermal Free Energies= -2116.138025

|               | E (Thermal)<br>KCal/Mol | CV<br>Cal/Mol-Kelvin | S<br>Cal/Mol-Kelvin |
|---------------|-------------------------|----------------------|---------------------|
| Total         | 101.678                 | 44.713               | 109.604             |
| Electronic    | 0.000                   | 0.000                | 1.377               |
| Translational | 0.889                   | 2.981                | 41.584              |
| Rotational    | 0.889                   | 2.981                | 30.014              |
| Vibrational   | 99.900                  | 38.751               | 36.629              |

Input orientation:

---

| Center<br>Number | Atomic<br>Number | Atomic<br>Type | Coordinates (Angstroms) |           |           |
|------------------|------------------|----------------|-------------------------|-----------|-----------|
|                  |                  |                | X                       | Y         | Z         |
| 1                | 8                | 0              | 0.921326                | -1.024619 | -0.314626 |
| 2                | 6                | 0              | 1.994268                | -0.348072 | -0.117126 |
| 3                | 6                | 0              | 1.802551                | 1.096084  | 0.284800  |
| 4                | 1                | 0              | 1.912830                | 1.138483  | 1.375100  |
| 5                | 1                | 0              | 2.584437                | 1.726992  | -0.149201 |
| 6                | 1                | 0              | 0.472173                | 1.866776  | -1.044286 |
| 7                | 8                | 0              | 3.130309                | -0.816470 | -0.196590 |
| 8                | 7                | 0              | 0.458765                | 1.581058  | -0.064343 |
| 9                | 29               | 0              | -0.741401               | -0.038327 | -0.048744 |
| 10               | 8                | 0              | -2.438845               | 1.061570  | 0.224814  |
| 11               | 1                | 0              | -3.218231               | 0.493622  | 0.156384  |
| 12               | 8                | 0              | -1.804020               | -1.783405 | -0.097520 |
| 13               | 1                | 0              | -2.500259               | -1.779709 | 0.572347  |
| 14               | 1                | 0              | -2.465388               | 1.424197  | 1.120526  |
| 15               | 1                | 0              | -1.224239               | -2.521564 | 0.132448  |
| 16               | 6                | 0              | 0.059406                | 2.740137  | 0.745562  |
| 17               | 1                | 0              | 0.838206                | 3.510865  | 0.724681  |
| 18               | 1                | 0              | -0.866794               | 3.162548  | 0.354335  |
| 19               | 1                | 0              | -0.095644               | 2.423834  | 1.780179  |

---

### Sarcosine ligand

Zero-point correction= 0.094651 (Hartree/Particle)  
Thermal correction to Energy= 0.101027  
Thermal correction to Enthalpy= 0.101971  
Thermal correction to Gibbs Free Energy= 0.064410  
Sum of electronic and zero-point Energies= -323.109018  
Sum of electronic and thermal Energies= -323.102642  
Sum of electronic and thermal Enthalpies= -323.101698  
Sum of electronic and thermal Free Energies= -323.139258

|               | E (Thermal)<br>KCal/Mol | CV<br>Cal/Mol-Kelvin | S<br>Cal/Mol-Kelvin |
|---------------|-------------------------|----------------------|---------------------|
| Total         | 63.395                  | 21.500               | 79.052              |
| Electronic    | 0.000                   | 0.000                | 0.000               |
| Translational | 0.889                   | 2.981                | 39.338              |
| Rotational    | 0.889                   | 2.981                | 26.683              |
| Vibrational   | 61.618                  | 15.538               | 13.031              |

#### Input orientation:

| Center<br>Number | Atomic<br>Number | Atomic<br>Type | Coordinates (Angstroms) |           |           |
|------------------|------------------|----------------|-------------------------|-----------|-----------|
|                  |                  |                | X                       | Y         | Z         |
| 1                | 8                | 0              | 0.655133                | 1.309933  | -0.053258 |
| 2                | 6                | 0              | 0.670071                | 0.055538  | -0.024155 |
| 3                | 6                | 0              | -0.648559               | -0.684966 | 0.126012  |
| 4                | 1                | 0              | -0.629898               | -1.568793 | -0.522272 |
| 5                | 1                | 0              | -0.657287               | -1.075661 | 1.162459  |
| 6                | 1                | 0              | -1.716226               | 0.997878  | 0.321990  |
| 7                | 8                | 0              | 1.701202                | -0.665469 | -0.063754 |
| 8                | 7                | 0              | -1.825640               | 0.111402  | -0.164967 |
| 9                | 6                | 0              | -3.025598               | -0.550812 | 0.316918  |
| 10               | 1                | 0              | -3.901655               | 0.083578  | 0.160937  |
| 11               | 1                | 0              | -3.187737               | -1.479514 | -0.240856 |
| 12               | 1                | 0              | -2.976734               | -0.814821 | 1.386376  |

[Cu(Suc)(H<sub>2</sub>O)<sub>2</sub>]

Zero-point correction= 0.132754 (Hartree/Particle)  
Thermal correction to Energy= 0.147211  
Thermal correction to Enthalpy= 0.148155  
Thermal correction to Gibbs Free Energy= 0.089987  
Sum of electronic and zero-point Energies= -2248.869006  
Sum of electronic and thermal Energies= -2248.854549  
Sum of electronic and thermal Enthalpies= -2248.853605  
Sum of electronic and thermal Free Energies= -2248.911773

|               | E (Thermal)<br>KCal/Mol | CV<br>Cal/Mol-Kelvin | S<br>Cal/Mol-Kelvin |
|---------------|-------------------------|----------------------|---------------------|
| Total         | 92.376                  | 49.314               | 122.426             |
| Electronic    | 0.000                   | 0.000                | 1.377               |
| Translational | 0.889                   | 2.981                | 41.999              |
| Rotational    | 0.889                   | 2.981                | 31.689              |
| Vibrational   | 90.599                  | 43.353               | 47.360              |

Input orientation:

---

| Center<br>Number | Atomic<br>Number | Atomic<br>Type | Coordinates (Angstroms)<br>X Y Z |           |           |
|------------------|------------------|----------------|----------------------------------|-----------|-----------|
| 1                | 6                | 0              | -1.679680                        | -0.504053 | -0.732851 |
| 2                | 1                | 0              | -2.095687                        | -1.110398 | 0.078793  |
| 3                | 1                | 0              | -1.696504                        | -1.148226 | -1.622188 |
| 4                | 6                | 0              | -2.481709                        | 0.759557  | -0.961475 |
| 5                | 1                | 0              | -2.059239                        | 1.336611  | -1.793061 |
| 6                | 6                | 0              | -0.244434                        | -0.263661 | -0.423157 |
| 7                | 8                | 0              | 0.330905                         | 0.835301  | -0.684401 |
| 8                | 8                | 0              | 0.465692                         | -1.174990 | 0.109136  |
| 9                | 29               | 0              | 2.042750                         | 0.063093  | 0.055029  |
| 10               | 8                | 0              | 3.349832                         | 1.492675  | -0.410756 |
| 11               | 1                | 0              | 4.076307                         | 1.539068  | 0.225077  |
| 12               | 8                | 0              | 3.420686                         | -1.094059 | 0.945033  |
| 13               | 1                | 0              | 3.204706                         | -2.022246 | 0.782624  |
| 14               | 1                | 0              | 2.918673                         | 2.357240  | -0.382165 |
| 15               | 1                | 0              | 4.297451                         | -0.956175 | 0.561555  |
| 16               | 1                | 0              | -2.419688                        | 1.416182  | -0.085613 |
| 17               | 6                | 0              | -3.956842                        | 0.546118  | -1.276334 |
| 18               | 8                | 0              | -4.661456                        | 1.588889  | -1.330369 |
| 19               | 8                | 0              | -4.376209                        | -0.620389 | -1.473552 |

---

### Succinic acid

Zero-point correction= 0.079707 (Hartree/Particle)  
Thermal correction to Energy= 0.086398  
Thermal correction to Enthalpy= 0.087342  
Thermal correction to Gibbs Free Energy= 0.047528  
Sum of electronic and zero-point Energies= -455.894485  
Sum of electronic and thermal Energies= -455.887794  
Sum of electronic and thermal Enthalpies= -455.886850  
Sum of electronic and thermal Free Energies= -455.926664

|               | E (Thermal)<br>KCal/Mol | CV<br>Cal/Mol-Kelvin | S<br>Cal/Mol-Kelvin |
|---------------|-------------------------|----------------------|---------------------|
| Total         | 54.215                  | 23.154               | 83.797              |
| Electronic    | 0.000                   | 0.000                | 0.000               |
| Translational | 0.889                   | 2.981                | 40.161              |
| Rotational    | 0.889                   | 2.981                | 28.260              |
| Vibrational   | 52.438                  | 17.193               | 15.376              |

#### Input orientation:

| Center<br>Number | Atomic<br>Number | Atomic<br>Type | Coordinates (Angstroms) |           |           |
|------------------|------------------|----------------|-------------------------|-----------|-----------|
|                  |                  |                | X                       | Y         | Z         |
| 1                | 6                | 0              | 0.060072                | 1.861237  | -0.130871 |
| 2                | 1                | 0              | -0.309803               | 2.681884  | 0.499594  |
| 3                | 1                | 0              | -0.339861               | 2.048803  | -1.132559 |
| 4                | 6                | 0              | -0.436569               | 0.539901  | 0.412162  |
| 5                | 1                | 0              | -0.106198               | 0.390790  | 1.445710  |
| 6                | 1                | 0              | -1.534731               | 0.541169  | 0.449655  |
| 7                | 6                | 0              | 1.575077                | 2.008967  | -0.180391 |
| 8                | 8                | 0              | 2.271273                | 1.316579  | 0.605768  |
| 9                | 8                | 0              | 2.037660                | 2.855003  | -0.993389 |
| 10               | 6                | 0              | -0.037563               | -0.688640 | -0.395362 |
| 11               | 8                | 0              | 0.356827                | -0.533940 | -1.579545 |
| 12               | 8                | 0              | -0.161623               | -1.804945 | 0.178585  |



[Cu(Asp)(H<sub>2</sub>O)<sub>2</sub>]

Zero-point correction= 0.152334 (Hartree/Particle)  
Thermal correction to Energy= 0.167421  
Thermal correction to Enthalpy= 0.168365  
Thermal correction to Gibbs Free Energy= 0.109041  
Sum of electronic and zero-point Energies= -2304.213027  
Sum of electronic and thermal Energies= -2304.197940  
Sum of electronic and thermal Enthalpies= -2304.196996  
Sum of electronic and thermal Free Energies= -2304.256320

|               | E (Thermal)<br>KCal/Mol | CV<br>Cal/Mol-Kelvin | S<br>Cal/Mol-Kelvin |
|---------------|-------------------------|----------------------|---------------------|
| Total         | 105.058                 | 52.734               | 124.858             |
| Electronic    | 0.000                   | 0.000                | 1.377               |
| Translational | 0.889                   | 2.981                | 42.200              |
| Rotational    | 0.889                   | 2.981                | 31.838              |
| Vibrational   | 103.281                 | 46.773               | 49.443              |

Input orientation:

| Center<br>Number | Atomic<br>Number | Atomic<br>Type | Coordinates (Angstroms)<br>X Y Z |           |           |
|------------------|------------------|----------------|----------------------------------|-----------|-----------|
| 1                | 6                | 0              | -1.980093                        | -0.657489 | 0.137976  |
| 2                | 6                | 0              | -1.367084                        | 1.766201  | -0.434363 |
| 3                | 6                | 0              | -2.193067                        | 0.813484  | 0.416451  |
| 4                | 1                | 0              | -1.444500                        | 1.488784  | -1.490525 |
| 5                | 1                | 0              | -1.961061                        | 0.990828  | 1.477222  |
| 6                | 1                | 0              | -3.255466                        | 1.031153  | 0.281519  |
| 7                | 1                | 0              | 2.626698                         | -1.937065 | -0.437597 |
| 8                | 1                | 0              | 1.217260                         | -2.564930 | -0.444556 |
| 9                | 8                | 0              | 2.691211                         | 0.842546  | 0.254760  |
| 10               | 8                | 0              | -0.792767                        | -1.074542 | -0.114031 |
| 11               | 8                | 0              | -2.949651                        | -1.424672 | 0.175858  |
| 12               | 7                | 0              | 0.050834                         | 1.702210  | -0.048628 |
| 13               | 29               | 0              | 0.883376                         | -0.096221 | 0.014091  |
| 14               | 1                | 0              | 0.601174                         | 2.282463  | -0.683682 |
| 15               | 1                | 0              | 0.145248                         | 2.142574  | 0.870886  |
| 16               | 8                | 0              | 1.778939                         | -1.934432 | 0.025000  |
| 17               | 1                | 0              | 3.427825                         | 0.218335  | 0.220277  |
| 18               | 1                | 0              | 2.874581                         | 1.490669  | -0.438094 |
| 19               | 6                | 0              | -1.938788                        | 3.183907  | -0.252845 |
| 20               | 8                | 0              | -2.936378                        | 3.468385  | -0.953814 |
| 21               | 8                | 0              | -1.389493                        | 3.913557  | 0.603598  |

### Aspartic acid ligand

Zero-point correction= 0.097056 (Hartree/Particle)  
Thermal correction to Energy= 0.105930  
Thermal correction to Enthalpy= 0.106874  
Thermal correction to Gibbs Free Energy= 0.061859  
Sum of electronic and zero-point Energies= -511.217363  
Sum of electronic and thermal Energies= -511.208489  
Sum of electronic and thermal Enthalpies= -511.207545  
Sum of electronic and thermal Free Energies= -511.252560

|               | E (Thermal)<br>KCal/Mol | CV<br>Cal/Mol-Kelvin | S<br>Cal/Mol-Kelvin |
|---------------|-------------------------|----------------------|---------------------|
| Total         | 66.472                  | 30.132               | 94.742              |
| Electronic    | 0.000                   | 0.000                | 0.000               |
| Translational | 0.889                   | 2.981                | 40.523              |
| Rotational    | 0.889                   | 2.981                | 29.190              |
| Vibrational   | 64.694                  | 24.170               | 25.029              |

#### Input orientation:

| Center<br>Number | Atomic<br>Number | Atomic<br>Type | Coordinates (Angstroms) |           |           |
|------------------|------------------|----------------|-------------------------|-----------|-----------|
|                  |                  |                | X                       | Y         | Z         |
| 1                | 6                | 0              | -1.910588               | -0.665079 | 0.095329  |
| 2                | 6                | 0              | -1.360251               | 1.791323  | -0.431289 |
| 3                | 6                | 0              | -2.237418               | 0.806587  | 0.321569  |
| 4                | 1                | 0              | -1.473344               | 1.589197  | -1.509804 |
| 5                | 1                | 0              | -2.188313               | 1.015800  | 1.398071  |
| 6                | 1                | 0              | -3.285555               | 0.936733  | 0.022909  |
| 7                | 8                | 0              | -1.298910               | -0.994388 | -0.952111 |
| 8                | 8                | 0              | -2.317693               | -1.470762 | 0.974585  |
| 9                | 7                | 0              | 0.023995                | 1.649711  | 0.010129  |
| 10               | 1                | 0              | 0.407468                | 0.803111  | -0.402520 |
| 11               | 1                | 0              | 0.569746                | 2.429502  | -0.345626 |
| 12               | 6                | 0              | -1.884506               | 3.216804  | -0.238434 |
| 13               | 8                | 0              | -3.052221               | 3.434878  | -0.656577 |
| 14               | 8                | 0              | -1.136692               | 4.073021  | 0.292673  |

**[Cu(AspH)(H<sub>2</sub>O)<sub>2</sub>]<sup>+</sup>**

Zero-point correction= 0.165646 (Hartree/Particle)  
Thermal correction to Energy= 0.180793  
Thermal correction to Enthalpy= 0.181737  
Thermal correction to Gibbs Free Energy= 0.122715  
Sum of electronic and zero-point Energies= -2304.649425  
Sum of electronic and thermal Energies= -2304.634277  
Sum of electronic and thermal Enthalpies= -2304.633333  
Sum of electronic and thermal Free Energies= -2304.692355

|               | E (Thermal)<br>KCal/Mol | CV<br>Cal/Mol-Kelvin | S<br>Cal/Mol-Kelvin |
|---------------|-------------------------|----------------------|---------------------|
| Total         | 113.449                 | 53.911               | 124.223             |
| Electronic    | 0.000                   | 0.000                | 1.377               |
| Translational | 0.889                   | 2.981                | 42.213              |
| Rotational    | 0.889                   | 2.981                | 31.890              |
| Vibrational   | 111.672                 | 47.950               | 48.742              |

Input orientation:

| Center<br>Number | Atomic<br>Number | Atomic<br>Type | Coordinates (Angstroms) |           |           |
|------------------|------------------|----------------|-------------------------|-----------|-----------|
|                  |                  |                | X                       | Y         | Z         |
| 1                | 6                | 0              | -1.978617               | -0.636913 | 0.228571  |
| 2                | 6                | 0              | -1.296966               | 1.788408  | -0.281792 |
| 3                | 6                | 0              | -2.238358               | 0.839655  | 0.445995  |
| 4                | 1                | 0              | -1.251118               | 1.526230  | -1.344581 |
| 5                | 1                | 0              | -2.170835               | 1.030141  | 1.527211  |
| 6                | 1                | 0              | -3.272066               | 1.041187  | 0.156825  |
| 7                | 1                | 0              | 2.570270                | -1.929251 | -0.638782 |
| 8                | 1                | 0              | 1.157101                | -2.540298 | -0.525659 |
| 9                | 8                | 0              | 2.746760                | 0.849169  | 0.067430  |
| 10               | 8                | 0              | -0.793908               | -1.034813 | -0.055582 |
| 11               | 8                | 0              | -2.927305               | -1.418386 | 0.351798  |
| 12               | 7                | 0              | 0.052312                | 1.703229  | 0.279590  |
| 13               | 29               | 0              | 0.907594                | -0.087748 | 0.018488  |
| 14               | 1                | 0              | 0.655713                | 2.410012  | -0.143513 |
| 15               | 1                | 0              | 0.017873                | 1.916387  | 1.278953  |
| 16               | 8                | 0              | 1.767270                | -1.921959 | -0.102225 |
| 17               | 1                | 0              | 3.462149                | 0.211908  | -0.058554 |
| 18               | 1                | 0              | 2.833985                | 1.477969  | -0.661571 |
| 19               | 6                | 0              | -1.833349               | 3.198457  | -0.173987 |
| 20               | 8                | 0              | -2.879924               | 3.385110  | -0.971004 |
| 21               | 8                | 0              | -1.377818               | 4.046042  | 0.555539  |
| 22               | 1                | 0              | -3.221994               | 4.286554  | -0.847475 |

### Aspartic acid-H ligand

Zero-point correction= 0.109776 (Hartree/Particle)  
Thermal correction to Energy= 0.118494  
Thermal correction to Enthalpy= 0.119438  
Thermal correction to Gibbs Free Energy= 0.074858  
Sum of electronic and zero-point Energies= -511.669768  
Sum of electronic and thermal Energies= -511.661050  
Sum of electronic and thermal Enthalpies= -511.660106  
Sum of electronic and thermal Free Energies= -511.704685

|               | E (Thermal)<br>KCal/Mol | CV<br>Cal/Mol-Kelvin | S<br>Cal/Mol-Kelvin |
|---------------|-------------------------|----------------------|---------------------|
| Total         | 74.356                  | 30.400               | 93.825              |
| Electronic    | 0.000                   | 0.000                | 0.000               |
| Translational | 0.889                   | 2.981                | 40.546              |
| Rotational    | 0.889                   | 2.981                | 29.199              |
| Vibrational   | 72.578                  | 24.438               | 24.080              |

#### Input orientation:

| Center<br>Number | Atomic<br>Number | Atomic<br>Type | Coordinates (Angstroms) |           |           |
|------------------|------------------|----------------|-------------------------|-----------|-----------|
|                  |                  |                | X                       | Y         | Z         |
| 1                | 6                | 0              | -1.968532               | -0.662780 | 0.199622  |
| 2                | 6                | 0              | -1.413711               | 1.758603  | -0.420639 |
| 3                | 6                | 0              | -2.272531               | 0.797527  | 0.403563  |
| 4                | 1                | 0              | -1.558718               | 1.541103  | -1.484980 |
| 5                | 1                | 0              | -2.108101               | 1.005172  | 1.472382  |
| 6                | 1                | 0              | -3.334584               | 0.953111  | 0.203123  |
| 7                | 8                | 0              | -0.701285               | -0.976931 | -0.023553 |
| 8                | 8                | 0              | -2.819666               | -1.529377 | 0.261300  |
| 9                | 7                | 0              | -0.002142               | 1.532971  | -0.098624 |
| 10               | 6                | 0              | -1.911695               | 3.187039  | -0.153729 |
| 11               | 8                | 0              | -2.966782               | 3.524810  | -0.743970 |
| 12               | 8                | 0              | -1.255613               | 3.887319  | 0.651892  |
| 13               | 1                | 0              | 0.191887                | 1.992269  | 0.791311  |
| 14               | 1                | 0              | 0.583790                | 1.993075  | -0.790519 |
| 15               | 1                | 0              | -0.164400               | -0.112850 | -0.049896 |

**[Cu(Asp)<sub>2</sub>(H<sub>2</sub>O)<sub>2</sub>]<sup>2-</sup>**

Zero-point correction= 0.202112 (Hartree/Particle)  
Thermal correction to Energy= 0.221352  
Thermal correction to Enthalpy= 0.222296  
Thermal correction to Gibbs Free Energy= 0.151336  
Sum of electronic and zero-point Energies= -2662.640311  
Sum of electronic and thermal Energies= -2662.621071  
Sum of electronic and thermal Enthalpies= -2662.620127  
Sum of electronic and thermal Free Energies= -2662.691087

|               | E (Thermal)<br>KCal/Mol | CV<br>Cal/Mol-Kelvin | S<br>Cal/Mol-Kelvin |
|---------------|-------------------------|----------------------|---------------------|
| Total         | 138.900                 | 67.946               | 149.348             |
| Electronic    | 0.000                   | 0.000                | 1.377               |
| Translational | 0.889                   | 2.981                | 43.231              |
| Rotational    | 0.889                   | 2.981                | 34.347              |
| Vibrational   | 137.123                 | 61.984               | 70.392              |

Input orientation:

| Center<br>Number | Atomic<br>Number | Atomic<br>Type | Coordinates (Angstroms)<br>X Y Z |           |           |
|------------------|------------------|----------------|----------------------------------|-----------|-----------|
| 1                | 6                | 0              | -2.836120                        | -0.603543 | 0.428000  |
| 2                | 6                | 0              | -2.354994                        | 1.791007  | -0.388696 |
| 3                | 6                | 0              | -3.079968                        | 0.883009  | 0.591759  |
| 4                | 1                | 0              | -2.496898                        | 1.418896  | -1.409758 |
| 5                | 1                | 0              | -2.783454                        | 1.155301  | 1.616407  |
| 6                | 1                | 0              | -4.157759                        | 1.050729  | 0.524763  |
| 7                | 6                | 0              | 2.302057                         | -1.708859 | -0.865091 |
| 8                | 1                | 0              | 0.347648                         | -2.253988 | -1.175057 |
| 9                | 1                | 0              | 0.807501                         | -2.329652 | 0.376969  |
| 10               | 6                | 0              | 2.863460                         | 0.524588  | 0.287937  |
| 11               | 6                | 0              | 3.110084                         | -0.967104 | 0.187606  |
| 12               | 1                | 0              | 2.363054                         | -1.175115 | -1.820367 |
| 13               | 1                | 0              | 2.896198                         | -1.404186 | 1.175117  |
| 14               | 1                | 0              | 4.177767                         | -1.114269 | 0.006867  |
| 15               | 8                | 0              | 1.706059                         | 0.992215  | 0.006735  |
| 16               | 8                | 0              | -1.708212                        | -1.011726 | -0.017624 |
| 17               | 8                | 0              | 3.800905                         | 1.249637  | 0.655575  |
| 18               | 8                | 0              | -3.745798                        | -1.384768 | 0.747039  |
| 19               | 7                | 0              | 0.890900                         | -1.759577 | -0.467293 |
| 20               | 7                | 0              | -0.915938                        | 1.785539  | -0.103774 |
| 21               | 29               | 0              | -0.007396                        | 0.002668  | -0.159721 |
| 22               | 1                | 0              | -0.428348                        | 2.391683  | -0.763585 |
| 23               | 1                | 0              | -0.760271                        | 2.211431  | 0.812255  |
| 24               | 6                | 0              | -2.971031                        | 3.198367  | -0.311014 |
| 25               | 8                | 0              | -4.087041                        | 3.335575  | -0.866891 |
| 26               | 8                | 0              | -2.336671                        | 4.079946  | 0.312256  |
| 27               | 6                | 0              | 2.913268                         | -3.105990 | -1.066876 |
| 28               | 8                | 0              | 2.325898                         | -4.081224 | -0.545342 |
| 29               | 8                | 0              | 3.979475                         | -3.143704 | -1.726452 |

**[Cu(Asp)(AspH)(H<sub>2</sub>O)<sub>2</sub>]**

Zero-point correction= 0.214530 (Hartree/Particle)  
Thermal correction to Energy= 0.234054  
Thermal correction to Enthalpy= 0.234999  
Thermal correction to Gibbs Free Energy= 0.163123  
Sum of electronic and zero-point Energies= -2663.081443  
Sum of electronic and thermal Energies= -2663.061919  
Sum of electronic and thermal Enthalpies= -2663.060975  
Sum of electronic and thermal Free Energies= -2663.132850

|               | E (Thermal)<br>KCal/Mol | CV<br>Cal/Mol-Kelvin | S<br>Cal/Mol-Kelvin |
|---------------|-------------------------|----------------------|---------------------|
| Total         | 146.871                 | 69.505               | 151.275             |
| Electronic    | 0.000                   | 0.000                | 1.377               |
| Translational | 0.889                   | 2.981                | 43.240              |
| Rotational    | 0.889                   | 2.981                | 34.059              |
| Vibrational   | 145.094                 | 63.543               | 72.598              |

Input orientation:

| Center<br>Number | Atomic<br>Number | Atomic<br>Type | Coordinates (Angstroms)<br>X Y Z |           |           |
|------------------|------------------|----------------|----------------------------------|-----------|-----------|
| 1                | 6                | 0              | -2.834570                        | -0.657870 | -0.058705 |
| 2                | 6                | 0              | -2.345357                        | 1.825339  | -0.386484 |
| 3                | 6                | 0              | -3.067306                        | 0.756589  | 0.424889  |
| 4                | 1                | 0              | -2.485226                        | 1.636257  | -1.455824 |
| 5                | 1                | 0              | -2.733277                        | 0.820213  | 1.471308  |
| 6                | 1                | 0              | -4.143591                        | 0.946913  | 0.418067  |
| 7                | 6                | 0              | 2.317031                         | -1.734107 | 0.480921  |
| 8                | 1                | 0              | 0.925143                         | -2.195575 | -0.938881 |
| 9                | 1                | 0              | 0.362043                         | -2.367582 | 0.589394  |
| 10               | 6                | 0              | 2.895303                         | 0.668374  | -0.163418 |
| 11               | 6                | 0              | 3.166687                         | -0.807773 | -0.374533 |
| 12               | 1                | 0              | 2.766750                         | -2.737246 | 0.449732  |
| 13               | 1                | 0              | 4.227415                         | -0.996684 | -0.199051 |
| 14               | 1                | 0              | 2.976455                         | -1.040307 | -1.430080 |
| 15               | 8                | 0              | 1.714182                         | 1.026168  | 0.177641  |
| 16               | 8                | 0              | -1.652596                        | -0.995810 | -0.420566 |
| 17               | 8                | 0              | 3.824538                         | 1.471148  | -0.321294 |
| 18               | 8                | 0              | -3.787226                        | -1.450330 | -0.086503 |
| 19               | 7                | 0              | 0.939587                         | -1.777183 | -0.009024 |
| 20               | 7                | 0              | -0.906266                        | 1.789488  | -0.100041 |
| 21               | 29               | 0              | 0.011427                         | 0.013980  | -0.093901 |
| 22               | 1                | 0              | -0.406251                        | 2.393391  | -0.752291 |
| 23               | 1                | 0              | -0.760777                        | 2.211133  | 0.821183  |
| 24               | 6                | 0              | -2.968886                        | 3.188337  | -0.044786 |
| 25               | 8                | 0              | -3.998355                        | 3.501822  | -0.687204 |
| 26               | 8                | 0              | -2.426503                        | 3.852316  | 0.868850  |
| 27               | 6                | 0              | 2.305832                         | -1.348988 | 1.940439  |
| 28               | 8                | 0              | 1.320629                         | -1.345469 | 2.638887  |
| 29               | 8                | 0              | 3.525252                         | -1.046023 | 2.376766  |
| 30               | 1                | 0              | 3.483314                         | -0.832723 | 3.323947  |

**[Cu(AspH)<sub>2</sub>(H<sub>2</sub>O)<sub>2</sub>]**

Zero-point correction= 0.227306 (Hartree/Particle)  
Thermal correction to Energy= 0.247111  
Thermal correction to Enthalpy= 0.248055  
Thermal correction to Gibbs Free Energy= 0.175705  
Sum of electronic and zero-point Energies= -2663.519769  
Sum of electronic and thermal Energies= -2663.499964  
Sum of electronic and thermal Enthalpies= -2663.499020  
Sum of electronic and thermal Free Energies= -2663.571370

|               | E (Thermal)<br>KCal/Mol | CV<br>Cal/Mol-Kelvin | S<br>Cal/Mol-Kelvin |
|---------------|-------------------------|----------------------|---------------------|
| Total         | 155.065                 | 71.025               | 152.275             |
| Electronic    | 0.000                   | 0.000                | 1.377               |
| Translational | 0.889                   | 2.981                | 43.250              |
| Rotational    | 0.889                   | 2.981                | 34.078              |
| Vibrational   | 153.287                 | 65.064               | 73.570              |

Input orientation:

```
-----
```

| Center<br>Number | Atomic<br>Number | Atomic<br>Type | Coordinates (Angstroms)<br>X Y Z |           |           |
|------------------|------------------|----------------|----------------------------------|-----------|-----------|
| 1                | 6                | 0              | -2.818518                        | -0.642298 | 0.001075  |
| 2                | 6                | 0              | -2.317431                        | 1.842610  | -0.255421 |
| 3                | 6                | 0              | -3.032785                        | 0.756004  | 0.544431  |
| 4                | 1                | 0              | -2.490471                        | 1.688663  | -1.325695 |
| 5                | 1                | 0              | -2.669186                        | 0.784218  | 1.581651  |
| 6                | 1                | 0              | -4.106873                        | 0.950855  | 0.572092  |
| 7                | 6                | 0              | 2.322449                         | -1.748984 | 0.432640  |
| 8                | 1                | 0              | 0.937552                         | -2.170731 | -1.007124 |
| 9                | 1                | 0              | 0.367119                         | -2.387675 | 0.513818  |
| 10               | 6                | 0              | 2.907431                         | 0.666460  | -0.153887 |
| 11               | 6                | 0              | 3.177164                         | -0.804561 | -0.397522 |
| 12               | 1                | 0              | 2.770228                         | -2.752038 | 0.380268  |
| 13               | 1                | 0              | 4.236876                         | -0.999479 | -0.223114 |
| 14               | 1                | 0              | 2.990117                         | -1.011509 | -1.458987 |
| 15               | 8                | 0              | 1.721711                         | 1.019450  | 0.179201  |
| 16               | 8                | 0              | -1.653604                        | -0.962566 | -0.422347 |
| 17               | 8                | 0              | 3.838674                         | 1.471448  | -0.279694 |
| 18               | 8                | 0              | -3.773045                        | -1.429686 | -0.008457 |
| 19               | 7                | 0              | 0.946721                         | -1.779915 | -0.065207 |
| 20               | 7                | 0              | -0.879580                        | 1.808319  | -0.002431 |
| 21               | 29               | 0              | 0.026807                         | 0.012504  | -0.094797 |
| 22               | 1                | 0              | -0.388991                        | 2.438097  | -0.637316 |
| 23               | 1                | 0              | -0.695711                        | 2.161173  | 0.939876  |
| 24               | 6                | 0              | -2.899419                        | 3.184245  | 0.129420  |
| 25               | 8                | 0              | -4.071350                        | 3.399766  | -0.459245 |
| 26               | 8                | 0              | -2.378381                        | 3.953920  | 0.901023  |
| 27               | 6                | 0              | 2.303564                         | -1.397194 | 1.900687  |
| 28               | 8                | 0              | 1.315220                         | -1.415277 | 2.594504  |
| 29               | 8                | 0              | 3.518731                         | -1.095056 | 2.348343  |
| 30               | 1                | 0              | -4.437339                        | 4.245472  | -0.150369 |
| 31               | 1                | 0              | 3.471478                         | -0.901305 | 3.299503  |

```
-----
```

**[Cu(Glu)(H<sub>2</sub>O)<sub>2</sub>]**

Zero-point correction= 0.181482 (Hartree/Particle)  
Thermal correction to Energy= 0.197531  
Thermal correction to Enthalpy= 0.198475  
Thermal correction to Gibbs Free Energy= 0.137113  
Sum of electronic and zero-point Energies= -2343.472892  
Sum of electronic and thermal Energies= -2343.456844  
Sum of electronic and thermal Enthalpies= -2343.455899  
Sum of electronic and thermal Free Energies= -2343.517261

|               | E (Thermal)<br>KCal/Mol | CV<br>Cal/Mol-Kelvin | S<br>Cal/Mol-Kelvin |
|---------------|-------------------------|----------------------|---------------------|
| Total         | 123.952                 | 57.013               | 129.147             |
| Electronic    | 0.000                   | 0.000                | 1.377               |
| Translational | 0.889                   | 2.981                | 42.377              |
| Rotational    | 0.889                   | 2.981                | 32.151              |
| Vibrational   | 122.175                 | 51.051               | 53.242              |

Input orientation:

| Center<br>Number | Atomic<br>Number | Atomic<br>Type | Coordinates (Angstroms)<br>X Y Z |           |           |
|------------------|------------------|----------------|----------------------------------|-----------|-----------|
| 1                | 8                | 0              | -3.342774                        | -0.864837 | -1.098928 |
| 2                | 6                | 0              | -3.019835                        | -0.494285 | 0.052607  |
| 3                | 6                | 0              | -1.541400                        | -0.155639 | 0.312347  |
| 4                | 1                | 0              | -1.227161                        | -0.725225 | 1.198340  |
| 5                | 1                | 0              | -0.997290                        | -1.470965 | -1.157196 |
| 6                | 1                | 0              | -0.785805                        | 0.088557  | -1.582482 |
| 7                | 8                | 0              | -3.787415                        | -0.360914 | 1.034670  |
| 8                | 7                | 0              | -0.674234                        | -0.567767 | -0.807971 |
| 9                | 29               | 0              | 1.253598                         | -0.698983 | -0.260182 |
| 10               | 8                | 0              | 1.047903                         | -2.685183 | 0.117650  |
| 11               | 1                | 0              | 1.772503                         | -3.046874 | 0.644806  |
| 12               | 8                | 0              | 3.113580                         | -0.689580 | 0.575745  |
| 13               | 1                | 0              | 3.665360                         | -0.032565 | 0.131458  |
| 14               | 1                | 0              | 0.243722                         | -2.881565 | 0.617422  |
| 15               | 1                | 0              | 3.590525                         | -1.526563 | 0.503807  |
| 16               | 6                | 0              | -1.401928                        | 1.333310  | 0.602937  |
| 17               | 1                | 0              | -1.751258                        | 1.901285  | -0.273149 |
| 18               | 1                | 0              | -2.094140                        | 1.564062  | 1.416696  |
| 19               | 6                | 0              | -0.002131                        | 1.810933  | 1.007805  |
| 20               | 1                | 0              | -0.098675                        | 2.728447  | 1.593631  |
| 21               | 1                | 0              | 0.481518                         | 1.053899  | 1.639198  |
| 22               | 6                | 0              | 0.874421                         | 2.128159  | -0.185388 |
| 23               | 8                | 0              | 1.523144                         | 1.169737  | -0.748199 |
| 24               | 8                | 0              | 0.932864                         | 3.290834  | -0.606640 |



### Glutamic acid ligand

Zero-point correction= 0.126269 (Hartree/Particle)  
Thermal correction to Energy= 0.136234  
Thermal correction to Enthalpy= 0.137179  
Thermal correction to Gibbs Free Energy= 0.089481  
Sum of electronic and zero-point Energies= -550.479299  
Sum of electronic and thermal Energies= -550.469334  
Sum of electronic and thermal Enthalpies= -550.468390  
Sum of electronic and thermal Free Energies= -550.516087

|               | E (Thermal)<br>KCal/Mol | CV<br>Cal/Mol-Kelvin | S<br>Cal/Mol-Kelvin |
|---------------|-------------------------|----------------------|---------------------|
| Total         | 85.488                  | 34.501               | 100.388             |
| Electronic    | 0.000                   | 0.000                | 0.000               |
| Translational | 0.889                   | 2.981                | 40.826              |
| Rotational    | 0.889                   | 2.981                | 30.129              |
| Vibrational   | 83.711                  | 28.539               | 29.432              |

#### Input orientation:

| Center<br>Number | Atomic<br>Number | Atomic<br>Type | Coordinates (Angstroms)<br>X Y Z |           |           |
|------------------|------------------|----------------|----------------------------------|-----------|-----------|
| 1                | 7                | 0              | 0.014209                         | -1.845634 | 0.049217  |
| 2                | 1                | 0              | 0.606764                         | -1.957480 | -0.771076 |
| 3                | 6                | 0              | -0.616615                        | -0.526652 | 0.000149  |
| 4                | 1                | 0              | -1.249884                        | -0.483463 | -0.894546 |
| 5                | 6                | 0              | -1.495921                        | -0.353235 | 1.230259  |
| 6                | 6                | 0              | 0.384455                         | 0.633415  | -0.082657 |
| 7                | 1                | 0              | -2.240251                        | -1.160893 | 1.234573  |
| 8                | 1                | 0              | -0.874354                        | -0.487537 | 2.128477  |
| 9                | 6                | 0              | -2.207436                        | 0.993701  | 1.299667  |
| 10               | 8                | 0              | 1.351832                         | 0.613834  | 0.721048  |
| 11               | 1                | 0              | -1.473623                        | 1.802026  | 1.405186  |
| 12               | 1                | 0              | -2.770044                        | 1.160065  | 0.373153  |
| 13               | 6                | 0              | -3.152447                        | 1.011629  | 2.489548  |
| 14               | 8                | 0              | -2.665802                        | 1.308346  | 3.612775  |
| 15               | 8                | 0              | -4.352525                        | 0.686705  | 2.288324  |
| 16               | 8                | 0              | 0.161011                         | 1.539680  | -0.926691 |
| 17               | 1                | 0              | 0.652370                         | -1.849377 | 0.844247  |

**[Cu(GluH)(H<sub>2</sub>O)<sub>2</sub>]<sup>+</sup>**

Zero-point correction= 0.194106 (Hartree/Particle)  
Thermal correction to Energy= 0.210309  
Thermal correction to Enthalpy= 0.211254  
Thermal correction to Gibbs Free Energy= 0.149651  
Sum of electronic and zero-point Energies= -2343.910348  
Sum of electronic and thermal Energies= -2343.894144  
Sum of electronic and thermal Enthalpies= -2343.893200  
Sum of electronic and thermal Free Energies= -2343.954803

|               | E (Thermal)<br>KCal/Mol | CV<br>Cal/Mol-Kelvin | S<br>Cal/Mol-Kelvin |
|---------------|-------------------------|----------------------|---------------------|
| Total         | 131.971                 | 58.577               | 129.655             |
| Electronic    | 0.000                   | 0.000                | 1.377               |
| Translational | 0.889                   | 2.981                | 42.389              |
| Rotational    | 0.889                   | 2.981                | 32.177              |
| Vibrational   | 130.194                 | 52.615               | 53.711              |

Input orientation:

| Center<br>Number | Atomic<br>Number | Atomic<br>Type | Coordinates (Angstroms)<br>X Y Z |           |           |
|------------------|------------------|----------------|----------------------------------|-----------|-----------|
| 1                | 8                | 0              | 2.223103                         | 3.520290  | -0.007652 |
| 2                | 6                | 0              | 2.560193                         | 2.410219  | 0.328530  |
| 3                | 6                | 0              | 1.754337                         | 1.156841  | 0.069526  |
| 4                | 1                | 0              | 1.747634                         | 0.568410  | 0.996481  |
| 5                | 1                | 0              | 0.030066                         | 2.235131  | 0.347482  |
| 6                | 1                | 0              | 0.329266                         | 1.869537  | -1.223123 |
| 7                | 8                | 0              | 3.697073                         | 2.140055  | 0.962389  |
| 8                | 7                | 0              | 0.368555                         | 1.497847  | -0.272251 |
| 9                | 29               | 0              | -0.877442                        | -0.083292 | -0.064705 |
| 10               | 8                | 0              | -1.089786                        | 0.408797  | 1.891574  |
| 11               | 1                | 0              | -1.704730                        | -0.187111 | 2.340289  |
| 12               | 8                | 0              | -2.128016                        | -1.669478 | 0.125506  |
| 13               | 1                | 0              | -1.923707                        | -2.176422 | 0.922607  |
| 14               | 1                | 0              | -0.251595                        | 0.320133  | 2.365854  |
| 15               | 1                | 0              | -1.969729                        | -2.269164 | -0.616068 |
| 16               | 6                | 0              | 2.430260                         | 0.348113  | -1.036545 |
| 17               | 1                | 0              | 2.483372                         | 0.966164  | -1.944816 |
| 18               | 1                | 0              | 3.460942                         | 0.166271  | -0.721464 |
| 19               | 6                | 0              | 1.770302                         | -0.998219 | -1.349706 |
| 20               | 1                | 0              | 2.522135                         | -1.657335 | -1.790070 |
| 21               | 1                | 0              | 1.415094                         | -1.462562 | -0.420684 |
| 22               | 6                | 0              | 0.634690                         | -0.882340 | -2.346141 |
| 23               | 8                | 0              | -0.547118                        | -0.616295 | -1.912450 |
| 24               | 8                | 0              | 0.869946                         | -1.034952 | -3.550878 |
| 25               | 1                | 0              | 4.201370                         | 2.962793  | 1.078922  |

### Glutamic acid-H ligand

Zero-point correction= 0.139896 (Hartree/Particle)  
Thermal correction to Energy= 0.150287  
Thermal correction to Enthalpy= 0.151231  
Thermal correction to Gibbs Free Energy= 0.102140  
Sum of electronic and zero-point Energies= -550.930184  
Sum of electronic and thermal Energies= -550.919793  
Sum of electronic and thermal Enthalpies= -550.918849  
Sum of electronic and thermal Free Energies= -550.967940

|               | E (Thermal)<br>KCal/Mol | CV<br>Cal/Mol-Kelvin | S<br>Cal/Mol-Kelvin |
|---------------|-------------------------|----------------------|---------------------|
| Total         | 94.307                  | 35.267               | 103.322             |
| Electronic    | 0.000                   | 0.000                | 0.000               |
| Translational | 0.889                   | 2.981                | 40.847              |
| Rotational    | 0.889                   | 2.981                | 30.176              |
| Vibrational   | 92.529                  | 29.305               | 32.298              |

#### Input orientation:

| Center<br>Number | Atomic<br>Number | Atomic<br>Type | Coordinates (Angstroms)<br>X Y Z |           |           |
|------------------|------------------|----------------|----------------------------------|-----------|-----------|
| 1                | 7                | 0              | 0.049435                         | -1.786402 | -0.004684 |
| 2                | 1                | 0              | 0.511751                         | -1.997169 | -0.893062 |
| 3                | 6                | 0              | -0.631117                        | -0.455533 | -0.044789 |
| 4                | 1                | 0              | -1.236109                        | -0.423673 | -0.953598 |
| 5                | 6                | 0              | -1.498677                        | -0.335443 | 1.196527  |
| 6                | 6                | 0              | 0.453257                         | 0.632382  | -0.084552 |
| 7                | 1                | 0              | -2.222951                        | -1.162068 | 1.188015  |
| 8                | 1                | 0              | -0.863698                        | -0.469455 | 2.083609  |
| 9                | 6                | 0              | -2.239661                        | 0.991791  | 1.283128  |
| 10               | 8                | 0              | 1.494213                         | 0.391784  | 0.569259  |
| 11               | 1                | 0              | -1.524421                        | 1.810583  | 1.421385  |
| 12               | 1                | 0              | -2.790932                        | 1.170919  | 0.353205  |
| 13               | 6                | 0              | -3.200460                        | 0.959253  | 2.464121  |
| 14               | 8                | 0              | -2.699738                        | 1.099323  | 3.610162  |
| 15               | 8                | 0              | -4.418787                        | 0.759120  | 2.223578  |
| 16               | 8                | 0              | 0.183296                         | 1.663298  | -0.733574 |
| 17               | 1                | 0              | 0.775939                         | -1.753828 | 0.721508  |
| 18               | 1                | 0              | -0.607284                        | -2.542407 | 0.208876  |

**[Cu(Glu)<sub>2</sub>(H<sub>2</sub>O)<sub>2</sub>]<sup>2-</sup>**

Zero-point correction= 0.258265 (Hartree/Particle)  
Thermal correction to Energy= 0.279789  
Thermal correction to Enthalpy= 0.280733  
Thermal correction to Gibbs Free Energy= 0.203842  
Sum of electronic and zero-point Energies= -2741.166811  
Sum of electronic and thermal Energies= -2741.145287  
Sum of electronic and thermal Enthalpies= -2741.144343  
Sum of electronic and thermal Free Energies= -2741.221234

|               | E (Thermal)<br>KCal/Mol | CV<br>Cal/Mol-Kelvin | S<br>Cal/Mol-Kelvin |
|---------------|-------------------------|----------------------|---------------------|
| Total         | 175.570                 | 77.401               | 161.832             |
| Electronic    | 0.000                   | 0.000                | 1.377               |
| Translational | 0.889                   | 2.981                | 43.478              |
| Rotational    | 0.889                   | 2.981                | 34.987              |
| Vibrational   | 173.793                 | 71.440               | 81.989              |

Input orientation:

| Center<br>Number | Atomic<br>Number | Atomic<br>Type | Coordinates (Angstroms) |           |           |
|------------------|------------------|----------------|-------------------------|-----------|-----------|
|                  |                  |                | X                       | Y         | Z         |
| 1                | 8                | 0              | 1.682840                | 1.006984  | 0.076405  |
| 2                | 6                | 0              | 2.746892                | 0.295045  | 0.034897  |
| 3                | 6                | 0              | 2.580512                | -1.221990 | 0.051424  |
| 4                | 1                | 0              | 2.980843                | -1.554022 | 1.018619  |
| 5                | 1                | 0              | 0.940927                | -2.038640 | -0.894875 |
| 6                | 1                | 0              | 0.930989                | -2.274829 | 0.721683  |
| 7                | 8                | 0              | 3.887026                | 0.770129  | 0.005113  |
| 8                | 7                | 0              | 1.148716                | -1.586275 | 0.004727  |
| 9                | 29               | 0              | -0.014591               | 0.017016  | 0.181979  |
| 10               | 1                | 0              | -1.233053               | 1.919006  | 1.315814  |
| 11               | 1                | 0              | -0.807923               | 2.371943  | -0.230867 |
| 12               | 6                | 0              | -2.768433               | -0.247748 | 0.110927  |
| 13               | 6                | 0              | -2.537125               | 1.238972  | -0.135606 |
| 14               | 7                | 0              | -1.197497               | 1.615981  | 0.345143  |
| 15               | 8                | 0              | -1.724872               | -0.977358 | 0.253892  |
| 16               | 8                | 0              | -3.925087               | -0.682078 | 0.124544  |
| 17               | 1                | 0              | -3.313135               | 1.794053  | 0.406618  |
| 18               | 6                | 0              | 3.394856                | -1.875466 | -1.060289 |
| 19               | 1                | 0              | 4.433613                | -1.558653 | -0.927174 |
| 20               | 1                | 0              | 3.069703                | -1.474425 | -2.029357 |
| 21               | 6                | 0              | 3.334535                | -3.394198 | -1.069258 |
| 22               | 1                | 0              | 4.217008                | -3.791121 | -1.586197 |
| 23               | 1                | 0              | 3.399249                | -3.787498 | -0.045426 |
| 24               | 6                | 0              | 2.135507                | -4.057698 | -1.742738 |
| 25               | 8                | 0              | 1.279846                | -3.338735 | -2.323541 |
| 26               | 8                | 0              | 2.095198                | -5.312853 | -1.683477 |
| 27               | 6                | 0              | -2.688319               | 1.515380  | -1.629631 |
| 28               | 1                | 0              | -3.598666               | 1.002612  | -1.958522 |
| 29               | 1                | 0              | -1.852425               | 1.044379  | -2.165536 |
| 30               | 6                | 0              | -2.811192               | 2.986230  | -2.001554 |
| 31               | 1                | 0              | -3.301492               | 3.071475  | -2.978624 |
| 32               | 1                | 0              | -3.485452               | 3.494497  | -1.298352 |
| 33               | 6                | 0              | -1.543835               | 3.830432  | -2.098041 |
| 34               | 8                | 0              | -0.429598               | 3.311363  | -1.820989 |
| 35               | 8                | 0              | -1.706522               | 5.021660  | -2.463785 |

### Glutamic acid(b) ligand

Zero-point correction= 0.126316 (Hartree/Particle)  
Thermal correction to Energy= 0.136071  
Thermal correction to Enthalpy= 0.137015  
Thermal correction to Gibbs Free Energy= 0.090092  
Sum of electronic and zero-point Energies= -550.478782  
Sum of electronic and thermal Energies= -550.469027  
Sum of electronic and thermal Enthalpies= -550.468083  
Sum of electronic and thermal Free Energies= -550.515007

|               | E (Thermal)<br>KCal/Mol | CV<br>Cal/Mol-Kelvin | S<br>Cal/Mol-Kelvin |
|---------------|-------------------------|----------------------|---------------------|
| Total         | 85.386                  | 34.409               | 98.759              |
| Electronic    | 0.000                   | 0.000                | 0.000               |
| Translational | 0.889                   | 2.981                | 40.826              |
| Rotational    | 0.889                   | 2.981                | 29.865              |
| Vibrational   | 83.608                  | 28.447               | 28.067              |

#### Input orientation:

```
-----
```

| Center<br>Number | Atomic<br>Number | Atomic<br>Type | Coordinates (Angstroms)<br>X Y Z |           |           |
|------------------|------------------|----------------|----------------------------------|-----------|-----------|
| 1                | 7                | 0              | -2.265574                        | 1.603165  | -0.308899 |
| 2                | 1                | 0              | -3.182860                        | 1.273941  | -0.601331 |
| 3                | 6                | 0              | -1.310097                        | 0.508835  | -0.438351 |
| 4                | 1                | 0              | -1.161922                        | 0.314002  | -1.509610 |
| 5                | 6                | 0              | 0.036441                         | 0.900240  | 0.161694  |
| 6                | 6                | 0              | -1.734710                        | -0.817732 | 0.205750  |
| 7                | 1                | 0              | -0.088349                        | 1.057956  | 1.242931  |
| 8                | 1                | 0              | 0.717750                         | 0.048705  | 0.047540  |
| 9                | 6                | 0              | 0.656750                         | 2.132782  | -0.474157 |
| 10               | 8                | 0              | -2.467814                        | -0.774743 | 1.225485  |
| 11               | 1                | 0              | 1.724056                         | 2.171665  | -0.214434 |
| 12               | 1                | 0              | 0.605851                         | 2.058919  | -1.567216 |
| 13               | 6                | 0              | 0.085704                         | 3.475763  | -0.039373 |
| 14               | 8                | 0              | -0.182939                        | 3.641356  | 1.178861  |
| 15               | 8                | 0              | -0.023767                        | 4.369730  | -0.922469 |
| 16               | 8                | 0              | -1.279698                        | -1.869114 | -0.318007 |
| 17               | 1                | 0              | -2.359847                        | 1.830017  | 0.680185  |

```
-----
```

**[Cu(Glu)(GluH)(H<sub>2</sub>O)<sub>2</sub>]<sup>-</sup>**

Zero-point correction= 0.271540 (Hartree/Particle)  
Thermal correction to Energy= 0.293258  
Thermal correction to Enthalpy= 0.294202  
Thermal correction to Gibbs Free Energy= 0.217433  
Sum of electronic and zero-point Energies= -2741.610530  
Sum of electronic and thermal Energies= -2741.588812  
Sum of electronic and thermal Enthalpies= -2741.587868  
Sum of electronic and thermal Free Energies= -2741.664637

|               | E (Thermal)<br>KCal/Mol | CV<br>Cal/Mol-Kelvin | S<br>Cal/Mol-Kelvin |
|---------------|-------------------------|----------------------|---------------------|
| Total         | 184.022                 | 78.788               | 161.575             |
| Electronic    | 0.000                   | 0.000                | 1.377               |
| Translational | 0.889                   | 2.981                | 43.486              |
| Rotational    | 0.889                   | 2.981                | 35.069              |
| Vibrational   | 182.245                 | 72.827               | 81.642              |

Input orientation:

---

| Center<br>Number | Atomic<br>Number | Atomic<br>Type | Coordinates (Angstroms) |           |           |
|------------------|------------------|----------------|-------------------------|-----------|-----------|
|                  |                  |                | X                       | Y         | Z         |
| 1                | 8                | 0              | 1.608805                | 1.028463  | -0.232036 |
| 2                | 6                | 0              | 2.663442                | 0.302131  | -0.265784 |
| 3                | 6                | 0              | 2.453853                | -1.207816 | -0.145386 |
| 4                | 1                | 0              | 2.598255                | -1.431217 | 0.921271  |
| 5                | 1                | 0              | 0.953324                | -1.713562 | -1.457918 |
| 6                | 1                | 0              | 0.758254                | -2.386616 | 0.018134  |
| 7                | 8                | 0              | 3.808103                | 0.755082  | -0.344419 |
| 8                | 7                | 0              | 1.048550                | -1.533250 | -0.457195 |
| 9                | 29               | 0              | -0.093142               | 0.056279  | -0.010447 |
| 10               | 1                | 0              | -1.152652               | 1.914597  | 1.358552  |
| 11               | 1                | 0              | -0.819300               | 2.455979  | -0.184059 |
| 12               | 6                | 0              | -2.840971               | -0.119807 | 0.176747  |
| 13               | 6                | 0              | -2.572349               | 1.365280  | -0.038420 |
| 14               | 7                | 0              | -1.191924               | 1.675443  | 0.370559  |
| 15               | 8                | 0              | -1.816326               | -0.891030 | 0.197042  |
| 16               | 8                | 0              | -4.006700               | -0.514410 | 0.278130  |
| 17               | 1                | 0              | -3.293772               | 1.932262  | 0.563097  |
| 18               | 6                | 0              | 3.464105                | -2.003826 | -0.954337 |
| 19               | 1                | 0              | 4.461249                | -1.682979 | -0.642921 |
| 20               | 1                | 0              | 3.369938                | -1.745234 | -2.016761 |
| 21               | 6                | 0              | 3.358225                | -3.506177 | -0.765651 |
| 22               | 1                | 0              | 4.316906                | -3.988197 | -0.995629 |
| 23               | 1                | 0              | 3.147432                | -3.769475 | 0.278891  |
| 24               | 6                | 0              | 2.353893                | -4.197351 | -1.632007 |
| 25               | 8                | 0              | 1.735759                | -3.702984 | -2.548687 |
| 26               | 8                | 0              | 2.227072                | -5.487947 | -1.297965 |
| 27               | 6                | 0              | -2.799540               | 1.684862  | -1.514819 |
| 28               | 1                | 0              | -3.736917               | 1.197870  | -1.805428 |
| 29               | 1                | 0              | -2.004324               | 1.211205  | -2.107464 |
| 30               | 6                | 0              | -2.916142               | 3.165903  | -1.846750 |
| 31               | 1                | 0              | -3.460223               | 3.281711  | -2.791647 |
| 32               | 1                | 0              | -3.538683               | 3.669748  | -1.094428 |
| 33               | 6                | 0              | -1.641842               | 3.990189  | -1.996489 |
| 34               | 8                | 0              | -0.525671               | 3.456012  | -1.760727 |
| 35               | 8                | 0              | -1.801446               | 5.182525  | -2.360162 |
| 36               | 1                | 0              | 1.594149                | -5.908782 | -1.902654 |

---

### Glutamic acid-H(b) ligand

Zero-point correction= 0.139244 (Hartree/Particle)  
Thermal correction to Energy= 0.149420  
Thermal correction to Enthalpy= 0.150364  
Thermal correction to Gibbs Free Energy= 0.102400  
Sum of electronic and zero-point Energies= -550.924668  
Sum of electronic and thermal Energies= -550.914492  
Sum of electronic and thermal Enthalpies= -550.913548  
Sum of electronic and thermal Free Energies= -550.961512

|               | E (Thermal)<br>KCal/Mol | CV<br>Cal/Mol-Kelvin | S<br>Cal/Mol-Kelvin |
|---------------|-------------------------|----------------------|---------------------|
| Total         | 93.762                  | 35.934               | 100.949             |
| Electronic    | 0.000                   | 0.000                | 0.000               |
| Translational | 0.889                   | 2.981                | 40.847              |
| Rotational    | 0.889                   | 2.981                | 30.158              |
| Vibrational   | 91.985                  | 29.972               | 29.945              |

#### Input orientation:

| Center<br>Number | Atomic<br>Number | Atomic<br>Type | Coordinates (Angstroms)<br>X Y Z |           |           |
|------------------|------------------|----------------|----------------------------------|-----------|-----------|
| 1                | 7                | 0              | 0.013028                         | -1.845105 | 0.082531  |
| 2                | 6                | 0              | -0.615812                        | -0.528100 | 0.008694  |
| 3                | 1                | 0              | -1.245725                        | -0.497349 | -0.888455 |
| 4                | 6                | 0              | -1.500647                        | -0.342744 | 1.232833  |
| 5                | 6                | 0              | 0.383851                         | 0.634689  | -0.081572 |
| 6                | 1                | 0              | -2.243905                        | -1.149683 | 1.247597  |
| 7                | 1                | 0              | -0.885295                        | -0.452851 | 2.136985  |
| 8                | 6                | 0              | -2.215010                        | 1.008516  | 1.257462  |
| 9                | 8                | 0              | 1.353805                         | 0.617495  | 0.718087  |
| 10               | 1                | 0              | -1.491711                        | 1.824748  | 1.358657  |
| 11               | 1                | 0              | -2.781913                        | 1.151887  | 0.332603  |
| 12               | 6                | 0              | -3.170738                        | 1.050607  | 2.401525  |
| 13               | 8                | 0              | -2.572915                        | 1.361138  | 3.558186  |
| 14               | 8                | 0              | -4.353811                        | 0.795746  | 2.331609  |
| 15               | 8                | 0              | 0.151479                         | 1.538480  | -0.924787 |
| 16               | 1                | 0              | 0.662520                         | -1.830279 | 0.868294  |
| 17               | 1                | 0              | 0.593261                         | -1.977651 | -0.743363 |
| 18               | 1                | 0              | -3.230857                        | 1.327226  | 4.272061  |

**[Cu(GluH)<sub>2</sub>(H<sub>2</sub>O)<sub>2</sub>]**

Zero-point correction= 0.284490 (Hartree/Particle)  
 Thermal correction to Energy= 0.306425  
 Thermal correction to Enthalpy= 0.307369  
 Thermal correction to Gibbs Free Energy= 0.230729  
 Sum of electronic and zero-point Energies= -2742.053127  
 Sum of electronic and thermal Energies= -2742.031192  
 Sum of electronic and thermal Enthalpies= -2742.030248  
 Sum of electronic and thermal Free Energies= -2742.106888

|               | E (Thermal)<br>KCal/Mol | CV<br>Cal/Mol-Kelvin | S<br>Cal/Mol-Kelvin |
|---------------|-------------------------|----------------------|---------------------|
| Total         | 192.285                 | 80.378               | 161.303             |
| Electronic    | 0.000                   | 0.000                | 1.377               |
| Translational | 0.889                   | 2.981                | 43.495              |
| Rotational    | 0.889                   | 2.981                | 35.082              |
| Vibrational   | 190.507                 | 74.416               | 81.348              |

Input orientation:

| Center<br>Number | Atomic<br>Number | Atomic<br>Type | Coordinates (Angstroms) |           |           |
|------------------|------------------|----------------|-------------------------|-----------|-----------|
|                  |                  |                | X                       | Y         | Z         |
| 1                | 8                | 0              | 1.639654                | 0.995964  | -0.206239 |
| 2                | 6                | 0              | 2.690239                | 0.262974  | -0.244094 |
| 3                | 6                | 0              | 2.470958                | -1.245261 | -0.124242 |
| 4                | 1                | 0              | 2.616302                | -1.471136 | 0.941743  |
| 5                | 1                | 0              | 0.960767                | -1.731778 | -1.433818 |
| 6                | 1                | 0              | 0.763367                | -2.409047 | 0.041555  |
| 7                | 8                | 0              | 3.836552                | 0.710038  | -0.326333 |
| 8                | 7                | 0              | 1.062672                | -1.558153 | -0.432600 |
| 9                | 29               | 0              | -0.065155               | 0.037760  | 0.024613  |
| 10               | 1                | 0              | -1.195211               | 1.806655  | 1.461395  |
| 11               | 1                | 0              | -0.804692               | 2.472877  | 0.000688  |
| 12               | 6                | 0              | -2.818124               | -0.149928 | 0.171365  |
| 13               | 6                | 0              | -2.551217               | 1.340944  | -0.021891 |
| 14               | 7                | 0              | -1.191004               | 1.645593  | 0.456234  |
| 15               | 8                | 0              | -1.788769               | -0.910898 | 0.228973  |
| 16               | 8                | 0              | -3.983714               | -0.551399 | 0.220885  |
| 17               | 1                | 0              | -3.300557               | 1.900375  | 0.551179  |
| 18               | 6                | 0              | 3.471735                | -2.049663 | -0.937221 |
| 19               | 1                | 0              | 4.472758                | -1.745309 | -0.621626 |
| 20               | 1                | 0              | 3.383434                | -1.783082 | -1.998091 |
| 21               | 6                | 0              | 3.342133                | -3.551639 | -0.758675 |
| 22               | 1                | 0              | 4.293415                | -4.046895 | -0.991693 |
| 23               | 1                | 0              | 3.126252                | -3.819157 | 0.283627  |
| 24               | 6                | 0              | 2.329172                | -4.221024 | -1.632301 |
| 25               | 8                | 0              | 1.733693                | -3.715419 | -2.557879 |
| 26               | 8                | 0              | 2.166333                | -5.506261 | -1.294134 |
| 27               | 6                | 0              | -2.717198               | 1.663278  | -1.504547 |
| 28               | 1                | 0              | -3.645126               | 1.185851  | -1.833759 |
| 29               | 1                | 0              | -1.902325               | 1.192432  | -2.071110 |
| 30               | 6                | 0              | -2.818247               | 3.142999  | -1.838926 |
| 31               | 1                | 0              | -3.363688               | 3.283841  | -2.779166 |
| 32               | 1                | 0              | -3.406456               | 3.680514  | -1.083146 |
| 33               | 6                | 0              | -1.523569               | 3.872525  | -1.995502 |
| 34               | 8                | 0              | -0.416929               | 3.414949  | -1.803615 |
| 35               | 8                | 0              | -1.715805               | 5.134346  | -2.389178 |
| 36               | 1                | 0              | 1.530037                | -5.913890 | -1.904254 |
| 37               | 1                | 0              | -0.854088               | 5.575242  | -2.468695 |



### Glutamic acid-H(c) ligand

Zero-point correction= 0.138299 (Hartree/Particle)  
Thermal correction to Energy= 0.148329  
Thermal correction to Enthalpy= 0.149273  
Thermal correction to Gibbs Free Energy= 0.101390  
Sum of electronic and zero-point Energies= -550.927580  
Sum of electronic and thermal Energies= -550.917550  
Sum of electronic and thermal Enthalpies= -550.916606  
Sum of electronic and thermal Free Energies= -550.964488

|               | E (Thermal)<br>KCal/Mol | CV<br>Cal/Mol-Kelvin | S<br>Cal/Mol-Kelvin |
|---------------|-------------------------|----------------------|---------------------|
| Total         | 93.078                  | 35.668               | 100.778             |
| Electronic    | 0.000                   | 0.000                | 0.000               |
| Translational | 0.889                   | 2.981                | 40.847              |
| Rotational    | 0.889                   | 2.981                | 29.909              |
| Vibrational   | 91.300                  | 29.706               | 30.021              |

#### Input orientation:

---

| Center<br>Number | Atomic<br>Number | Atomic<br>Type | Coordinates (Angstroms)<br>X Y Z |           |           |
|------------------|------------------|----------------|----------------------------------|-----------|-----------|
| 1                | 7                | 0              | -2.035134                        | 1.603247  | -0.529339 |
| 2                | 6                | 0              | -1.225700                        | 0.385536  | -0.566267 |
| 3                | 1                | 0              | -1.232638                        | -0.049099 | -1.575164 |
| 4                | 6                | 0              | 0.228014                         | 0.585692  | -0.144508 |
| 5                | 6                | 0              | -1.864421                        | -0.663632 | 0.330594  |
| 6                | 1                | 0              | 0.256611                         | 0.978529  | 0.880218  |
| 7                | 1                | 0              | 0.698250                         | -0.402397 | -0.113712 |
| 8                | 6                | 0              | 1.018258                         | 1.483781  | -1.080268 |
| 9                | 8                | 0              | -2.946559                        | -0.246378 | 0.969678  |
| 10               | 1                | 0              | 2.089245                         | 1.270241  | -0.971815 |
| 11               | 1                | 0              | 0.781859                         | 1.246977  | -2.126193 |
| 12               | 6                | 0              | 0.887828                         | 2.994213  | -0.903990 |
| 13               | 8                | 0              | 0.254071                         | 3.447402  | 0.084178  |
| 14               | 8                | 0              | 1.462090                         | 3.699225  | -1.773331 |
| 15               | 8                | 0              | -1.436790                        | -1.791098 | 0.465116  |
| 16               | 1                | 0              | -1.466210                        | 2.399886  | -0.241432 |
| 17               | 1                | 0              | -2.424499                        | 1.808495  | -1.442790 |
| 18               | 1                | 0              | -3.056277                        | 0.693031  | 0.653670  |

---

## Optimized geometries and energetic parameters of the benchmark 2 (pyridoxamine) Cu<sup>2+</sup> complexes

### Complex A

Zero-point correction= 0.268910 (Hartree/Particle)  
Thermal correction to Energy= 0.286980  
Thermal correction to Enthalpy= 0.287924  
Thermal correction to Gibbs Free Energy= 0.223515  
Sum of electronic and zero-point Energies= -2365.025988  
Sum of electronic and thermal Energies= -2365.007917  
Sum of electronic and thermal Enthalpies= -2365.006973  
Sum of electronic and thermal Free Energies= -2365.071383

|               | E (Thermal)<br>KCal/Mol | CV<br>Cal/Mol-Kelvin | S<br>Cal/Mol-Kelvin |
|---------------|-------------------------|----------------------|---------------------|
| Total         | 180.083                 | 68.286               | 135.562             |
| Electronic    | 0.000                   | 0.000                | 1.377               |
| Translational | 0.889                   | 2.981                | 42.657              |
| Rotational    | 0.889                   | 2.981                | 32.934              |
| Vibrational   | 178.305                 | 62.324               | 58.593              |

Input orientation:

| Center<br>Number | Atomic<br>Number | Atomic<br>Type | Coordinates (Angstroms) |           |           |
|------------------|------------------|----------------|-------------------------|-----------|-----------|
|                  |                  |                | X                       | Y         | Z         |
| 1                | 29               | 0              | 2.091736                | -0.278158 | 0.112397  |
| 2                | 8                | 0              | 0.646483                | 1.083072  | 0.997440  |
| 3                | 6                | 0              | -0.627391               | 1.003372  | 0.533370  |
| 4                | 6                | 0              | -1.230339               | -0.248208 | 0.569528  |
| 5                | 6                | 0              | -1.291609               | 2.120945  | 0.043013  |
| 6                | 6                | 0              | -2.521514               | -0.390778 | 0.048861  |
| 7                | 6                | 0              | -3.155765               | 0.727228  | -0.438613 |
| 8                | 1                | 0              | -4.153811               | 0.710336  | -0.857581 |
| 9                | 7                | 0              | -2.539120               | 1.918807  | -0.410439 |
| 10               | 6                | 0              | -0.468393               | -1.380464 | 1.184005  |
| 11               | 1                | 0              | -0.138865               | -1.082174 | 2.183602  |
| 12               | 1                | 0              | -1.099436               | -2.264198 | 1.286311  |
| 13               | 6                | 0              | -3.211458               | -1.716752 | -0.016870 |
| 14               | 1                | 0              | -3.298412               | -2.149054 | 0.988648  |
| 15               | 1                | 0              | -4.227326               | -1.576333 | -0.404310 |
| 16               | 6                | 0              | -0.703346               | 3.476092  | 0.010110  |
| 17               | 1                | 0              | -0.467299               | 3.812384  | 1.026043  |
| 18               | 1                | 0              | 0.231131                | 3.470800  | -0.562421 |
| 19               | 1                | 0              | -1.387882               | 4.194708  | -0.442151 |
| 20               | 8                | 0              | -2.450601               | -2.560927 | -0.865510 |
| 21               | 1                | 0              | -2.820298               | -3.449879 | -0.816205 |
| 22               | 8                | 0              | 3.407956                | 1.221049  | -0.020571 |
| 23               | 1                | 0              | 2.961471                | 2.029056  | -0.309565 |
| 24               | 1                | 0              | 4.087397                | 1.046799  | -0.686209 |
| 25               | 7                | 0              | 0.730648                | -1.708721 | 0.390140  |
| 26               | 1                | 0              | 1.227440                | -2.477701 | 0.842779  |
| 27               | 1                | 0              | 0.446767                | -2.056727 | -0.528750 |
| 28               | 1                | 0              | 4.112359                | -1.273420 | -1.050574 |
| 29               | 8                | 0              | 3.265164                | -1.661756 | -0.792631 |
| 30               | 1                | 0              | 2.858520                | -1.957309 | -1.619210 |
| 31               | 1                | 0              | -3.043746               | 2.727695  | -0.774183 |
| 32               | 1                | 0              | 0.983192                | 1.992039  | 1.050509  |

### Complex B(acid)

Zero-point correction= 0.294782 (Hartree/Particle)  
 Thermal correction to Energy= 0.315866  
 Thermal correction to Enthalpy= 0.316810  
 Thermal correction to Gibbs Free Energy= 0.245585  
 Sum of electronic and zero-point Energies= -2441.448047  
 Sum of electronic and thermal Energies= -2441.426963  
 Sum of electronic and thermal Enthalpies= -2441.426018  
 Sum of electronic and thermal Free Energies= -2441.497244

|               | E (Thermal)<br>KCal/Mol | CV<br>Cal/Mol-Kelvin | S<br>Cal/Mol-Kelvin |
|---------------|-------------------------|----------------------|---------------------|
| Total         | 198.209                 | 77.833               | 149.907             |
| Electronic    | 0.000                   | 0.000                | 1.377               |
| Translational | 0.889                   | 2.981                | 42.851              |
| Rotational    | 0.889                   | 2.981                | 33.657              |
| Vibrational   | 196.432                 | 71.871               | 72.022              |

Input orientation:

| Center<br>Number | Atomic<br>Number | Atomic<br>Type | Coordinates (Angstroms) |           |           |
|------------------|------------------|----------------|-------------------------|-----------|-----------|
|                  |                  |                | X                       | Y         | Z         |
| 1                | 29               | 0              | -2.691207               | -0.283562 | -0.133858 |
| 2                | 8                | 0              | 1.645785                | -2.196328 | 0.234070  |
| 3                | 6                | 0              | 2.264881                | -1.004068 | 0.177596  |
| 4                | 6                | 0              | 1.496032                | 0.138139  | 0.398424  |
| 5                | 6                | 0              | 3.630011                | -0.896163 | -0.092530 |
| 6                | 6                | 0              | 2.093615                | 1.400576  | 0.295022  |
| 7                | 6                | 0              | 3.436577                | 1.471709  | 0.015354  |
| 8                | 1                | 0              | 3.979575                | 2.402636  | -0.084728 |
| 9                | 7                | 0              | 4.142426                | 0.342333  | -0.152795 |
| 10               | 6                | 0              | 0.034636                | -0.021599 | 0.690316  |
| 11               | 1                | 0              | -0.140561               | -0.929739 | 1.270587  |
| 12               | 1                | 0              | -0.340052               | 0.822175  | 1.273217  |
| 13               | 6                | 0              | 1.304231                | 2.662755  | 0.444147  |
| 14               | 1                | 0              | 0.841102                | 2.704624  | 1.438915  |
| 15               | 1                | 0              | 1.975031                | 3.524818  | 0.352936  |
| 16               | 6                | 0              | 4.512406                | -2.060968 | -0.312608 |
| 17               | 1                | 0              | 4.498872                | -2.720405 | 0.562290  |
| 18               | 1                | 0              | 4.165905                | -2.645948 | -1.172093 |
| 19               | 1                | 0              | 5.542103                | -1.750875 | -0.496751 |
| 20               | 8                | 0              | 0.309369                | 2.681531  | -0.570528 |
| 21               | 1                | 0              | -0.289243               | 3.416039  | -0.392398 |
| 22               | 8                | 0              | -4.669813               | -0.397924 | 0.174130  |
| 23               | 1                | 0              | -4.992680               | 0.299512  | 0.760547  |
| 24               | 1                | 0              | -4.945828               | -1.228880 | 0.583292  |
| 25               | 7                | 0              | -0.756630               | -0.103633 | -0.555047 |
| 26               | 1                | 0              | -0.585487               | 0.748803  | -1.096546 |
| 27               | 1                | 0              | -0.448201               | -0.900253 | -1.115419 |
| 28               | 1                | 0              | -3.193203               | -2.762900 | 0.338873  |
| 29               | 8                | 0              | -2.468187               | -2.315824 | -0.118481 |
| 30               | 1                | 0              | -1.663327               | -2.594843 | 0.340827  |
| 31               | 1                | 0              | 5.137724                | 0.429339  | -0.358566 |
| 32               | 8                | 0              | -2.837703               | 1.754618  | -0.084078 |
| 33               | 1                | 0              | -3.742120               | 2.071272  | -0.211679 |
| 34               | 1                | 0              | -2.312674               | 2.205816  | -0.759079 |
| 35               | 1                | 0              | 2.246829                | -2.930070 | 0.043964  |

### Complex B(base)

Zero-point correction= 0.281110 (Hartree/Particle)  
Thermal correction to Energy= 0.301426  
Thermal correction to Enthalpy= 0.302371  
Thermal correction to Gibbs Free Energy= 0.233470  
Sum of electronic and zero-point Energies= -2441.016900  
Sum of electronic and thermal Energies= -2440.996583  
Sum of electronic and thermal Enthalpies= -2440.995639  
Sum of electronic and thermal Free Energies= -2441.064540

|               | E (Thermal)<br>KCal/Mol | CV<br>Cal/Mol-Kelvin | S<br>Cal/Mol-Kelvin |
|---------------|-------------------------|----------------------|---------------------|
| Total         | 189.148                 | 76.245               | 145.014             |
| Electronic    | 0.000                   | 0.000                | 1.377               |
| Translational | 0.889                   | 2.981                | 42.840              |
| Rotational    | 0.889                   | 2.981                | 33.597              |
| Vibrational   | 187.371                 | 70.284               | 67.199              |

Input orientation:

| Center<br>Number | Atomic<br>Number | Atomic<br>Type | Coordinates (Angstroms)<br>X Y Z |           |           |
|------------------|------------------|----------------|----------------------------------|-----------|-----------|
| 1                | 29               | 0              | 1.757131                         | -3.170520 | 0.999994  |
| 2                | 8                | 0              | 1.412034                         | 0.732426  | -2.154108 |
| 3                | 6                | 0              | 0.433311                         | 1.099689  | -1.428138 |
| 4                | 6                | 0              | 0.172338                         | 0.569957  | -0.132366 |
| 5                | 6                | 0              | -0.475440                        | 2.104699  | -1.885345 |
| 6                | 6                | 0              | -0.956217                        | 0.951473  | 0.599930  |
| 7                | 6                | 0              | -1.809060                        | 1.897231  | 0.078129  |
| 8                | 1                | 0              | -2.704409                        | 2.249591  | 0.572649  |
| 9                | 7                | 0              | -1.523518                        | 2.436213  | -1.124611 |
| 10               | 6                | 0              | 1.122897                         | -0.453038 | 0.394405  |
| 11               | 1                | 0              | 2.132740                         | -0.253985 | 0.027644  |
| 12               | 1                | 0              | 1.160241                         | -0.444084 | 1.485950  |
| 13               | 6                | 0              | -1.271923                        | 0.353308  | 1.941323  |
| 14               | 1                | 0              | -0.448379                        | 0.521102  | 2.642065  |
| 15               | 1                | 0              | -2.163576                        | 0.831534  | 2.361230  |
| 16               | 6                | 0              | -0.287025                        | 2.776448  | -3.186855 |
| 17               | 1                | 0              | 0.694015                         | 3.262853  | -3.224091 |
| 18               | 1                | 0              | -0.303906                        | 2.044725  | -4.001977 |
| 19               | 1                | 0              | -1.060475                        | 3.526101  | -3.367832 |
| 20               | 8                | 0              | -1.451517                        | -1.061058 | 1.884127  |
| 21               | 1                | 0              | -2.249057                        | -1.260739 | 1.378559  |
| 22               | 8                | 0              | 2.695934                         | -4.684838 | 1.973725  |
| 23               | 1                | 0              | 2.462848                         | -4.698694 | 2.911624  |
| 24               | 1                | 0              | 3.657080                         | -4.588572 | 1.946967  |
| 25               | 7                | 0              | 0.750370                         | -1.822898 | -0.041097 |
| 26               | 1                | 0              | -0.248324                        | -1.962158 | 0.126666  |
| 27               | 1                | 0              | 0.917090                         | -1.921211 | -1.043441 |
| 28               | 1                | 0              | 4.071847                         | -3.496189 | -0.093965 |
| 29               | 8                | 0              | 3.272263                         | -3.036131 | -0.381675 |
| 30               | 1                | 0              | 3.542167                         | -2.119519 | -0.529432 |
| 31               | 1                | 0              | -2.157047                        | 3.148010  | -1.486245 |
| 32               | 8                | 0              | 0.523014                         | -2.878784 | 2.587178  |
| 33               | 1                | 0              | 0.190463                         | -3.717101 | 2.932074  |
| 34               | 1                | 0              | -0.261658                        | -2.315571 | 2.408803  |

## Complex C(acid)

Zero-point correction= 0.295685 (Hartree/Particle)  
Thermal correction to Energy= 0.316080  
Thermal correction to Enthalpy= 0.317024  
Thermal correction to Gibbs Free Energy= 0.248392  
Sum of electronic and zero-point Energies= -2441.454572  
Sum of electronic and thermal Energies= -2441.434177  
Sum of electronic and thermal Enthalpies= -2441.433233  
Sum of electronic and thermal Free Energies= -2441.501865

|               | E (Thermal)<br>KCal/Mol | CV<br>Cal/Mol-Kelvin | S<br>Cal/Mol-Kelvin |
|---------------|-------------------------|----------------------|---------------------|
| Total         | 198.343                 | 76.811               | 144.449             |
| Electronic    | 0.000                   | 0.000                | 1.377               |
| Translational | 0.889                   | 2.981                | 42.851              |
| Rotational    | 0.889                   | 2.981                | 33.215              |
| Vibrational   | 196.566                 | 70.850               | 67.006              |

Input orientation:

| Center<br>Number | Atomic<br>Number | Atomic<br>Type | Coordinates (Angstroms) |           |           |
|------------------|------------------|----------------|-------------------------|-----------|-----------|
|                  |                  |                | X                       | Y         | Z         |
| 1                | 29               | 0              | 1.843674                | 0.007011  | 1.609197  |
| 2                | 8                | 0              | 0.225546                | 1.075182  | 1.555774  |
| 3                | 6                | 0              | -0.788943               | 0.894867  | 0.761553  |
| 4                | 6                | 0              | -1.477819               | -0.327117 | 0.616749  |
| 5                | 6                | 0              | -1.250006               | 2.005294  | 0.014049  |
| 6                | 6                | 0              | -2.580918               | -0.425460 | -0.245633 |
| 7                | 6                | 0              | -2.983776               | 0.688914  | -0.939485 |
| 8                | 1                | 0              | -3.820163               | 0.701608  | -1.625652 |
| 9                | 7                | 0              | -2.314288               | 1.845552  | -0.778307 |
| 10               | 6                | 0              | -1.002753               | -1.509042 | 1.400481  |
| 11               | 1                | 0              | -0.394269               | -1.192020 | 2.247233  |
| 12               | 1                | 0              | -1.833760               | -2.109171 | 1.774395  |
| 13               | 6                | 0              | -3.339696               | -1.702796 | -0.432762 |
| 14               | 1                | 0              | -3.721499               | -2.060212 | 0.532950  |
| 15               | 1                | 0              | -4.200437               | -1.525132 | -1.086677 |
| 16               | 6                | 0              | -0.584453               | 3.320447  | 0.087393  |
| 17               | 1                | 0              | -0.618392               | 3.706733  | 1.111193  |
| 18               | 1                | 0              | 0.473527                | 3.217158  | -0.177280 |
| 19               | 1                | 0              | -1.051962               | 4.043749  | -0.583257 |
| 20               | 8                | 0              | -2.468924               | -2.674292 | -1.007245 |
| 21               | 1                | 0              | -2.933029               | -3.519350 | -1.037833 |
| 22               | 8                | 0              | 1.791910                | 0.160772  | 3.618129  |
| 23               | 1                | 0              | 1.229849                | 0.908808  | 3.862331  |
| 24               | 1                | 0              | 2.661636                | 0.350725  | 3.994736  |
| 25               | 7                | 0              | -0.160279               | -2.400777 | 0.547299  |
| 26               | 1                | 0              | 0.225681                | -3.172004 | 1.096683  |
| 27               | 1                | 0              | -0.763101               | -2.783469 | -0.202696 |
| 28               | 1                | 0              | 4.043781                | -0.898026 | 2.516938  |
| 29               | 8                | 0              | 3.536837                | -1.064746 | 1.710508  |
| 30               | 1                | 0              | 4.140917                | -0.870400 | 0.981372  |
| 31               | 1                | 0              | -2.630896               | 2.656520  | -1.309902 |
| 32               | 8                | 0              | 1.777092                | -0.356140 | -0.402944 |
| 33               | 1                | 0              | 2.628164                | -0.580640 | -0.803529 |
| 34               | 1                | 0              | 1.440943                | 0.402896  | -0.900623 |
| 35               | 1                | 0              | 0.616221                | -1.870792 | 0.121048  |

### Complex C(base)

Zero-point correction= 0.279703 (Hartree/Particle)  
 Thermal correction to Energy= 0.300656  
 Thermal correction to Enthalpy= 0.301601  
 Thermal correction to Gibbs Free Energy= 0.231594  
 Sum of electronic and zero-point Energies= -2441.011707  
 Sum of electronic and thermal Energies= -2440.990753  
 Sum of electronic and thermal Enthalpies= -2440.989809  
 Sum of electronic and thermal Free Energies= -2441.059816

|               | E (Thermal)<br>KCal/Mol | CV<br>Cal/Mol-Kelvin | S<br>Cal/Mol-Kelvin |
|---------------|-------------------------|----------------------|---------------------|
| Total         | 188.665                 | 77.729               | 147.341             |
| Electronic    | 0.000                   | 0.000                | 1.377               |
| Translational | 0.889                   | 2.981                | 42.840              |
| Rotational    | 0.889                   | 2.981                | 33.283              |
| Vibrational   | 186.887                 | 71.767               | 69.841              |

Input orientation:

| Center<br>Number | Atomic<br>Number | Atomic<br>Type | Coordinates (Angstroms) |           |           |
|------------------|------------------|----------------|-------------------------|-----------|-----------|
|                  |                  |                | X                       | Y         | Z         |
| 1                | 29               | 0              | 1.921417                | -0.033159 | 1.486161  |
| 2                | 8                | 0              | 0.786854                | 0.636197  | 0.074993  |
| 3                | 6                | 0              | -0.522080               | 0.648996  | 0.120785  |
| 4                | 6                | 0              | -1.300831               | -0.518782 | 0.275644  |
| 5                | 6                | 0              | -1.180992               | 1.885252  | -0.019974 |
| 6                | 6                | 0              | -2.700412               | -0.429613 | 0.238070  |
| 7                | 6                | 0              | -3.290705               | 0.799371  | 0.064252  |
| 8                | 1                | 0              | -4.361732               | 0.948921  | 0.015781  |
| 9                | 7                | 0              | -2.522189               | 1.896749  | -0.048458 |
| 10               | 6                | 0              | -0.594922               | -1.835844 | 0.414171  |
| 11               | 1                | 0              | 0.168667                | -1.762078 | 1.197007  |
| 12               | 1                | 0              | -1.290316               | -2.606608 | 0.748756  |
| 13               | 6                | 0              | -3.579134               | -1.637125 | 0.348419  |
| 14               | 1                | 0              | -3.332042               | -2.208555 | 1.252651  |
| 15               | 1                | 0              | -4.625594               | -1.319618 | 0.437108  |
| 16               | 6                | 0              | -0.440373               | 3.156729  | -0.151432 |
| 17               | 1                | 0              | 0.242501                | 3.283562  | 0.695657  |
| 18               | 1                | 0              | 0.175906                | 3.146994  | -1.056506 |
| 19               | 1                | 0              | -1.116770               | 4.012646  | -0.195734 |
| 20               | 8                | 0              | -3.390144               | -2.435512 | -0.811806 |
| 21               | 1                | 0              | -3.843740               | -3.274715 | -0.675213 |
| 22               | 8                | 0              | 0.764215                | 0.746758  | 2.957197  |
| 23               | 1                | 0              | 0.375330                | 1.581244  | 2.659245  |
| 24               | 1                | 0              | 1.305905                | 0.979133  | 3.723757  |
| 25               | 7                | 0              | 0.047330                | -2.284215 | -0.821653 |
| 26               | 1                | 0              | -0.658791               | -2.335811 | -1.553480 |
| 27               | 1                | 0              | 2.999665                | -0.661282 | 3.732167  |
| 28               | 8                | 0              | 3.149425                | -0.945252 | 2.820726  |
| 29               | 1                | 0              | 4.078022                | -0.750825 | 2.634497  |
| 30               | 1                | 0              | -2.985852               | 2.797025  | -0.163083 |
| 31               | 8                | 0              | 3.112218                | -0.839748 | 0.057973  |
| 32               | 1                | 0              | 4.043801                | -0.630302 | 0.207671  |
| 33               | 1                | 0              | 2.886516                | -0.456204 | -0.800179 |
| 34               | 1                | 0              | 0.715869                | -1.574917 | -1.117275 |

## Complex D

Zero-point correction= 0.254437 (Hartree/Particle)  
Thermal correction to Energy= 0.272627  
Thermal correction to Enthalpy= 0.273571  
Thermal correction to Gibbs Free Energy= 0.209167  
Sum of electronic and zero-point Energies= -2364.613642  
Sum of electronic and thermal Energies= -2364.595452  
Sum of electronic and thermal Enthalpies= -2364.594507  
Sum of electronic and thermal Free Energies= -2364.658912

|               | E (Thermal)<br>KCal/Mol | CV<br>Cal/Mol-Kelvin | S<br>Cal/Mol-Kelvin |
|---------------|-------------------------|----------------------|---------------------|
| Total         | 171.076                 | 67.969               | 135.550             |
| Electronic    | 0.000                   | 0.000                | 1.377               |
| Translational | 0.889                   | 2.981                | 42.646              |
| Rotational    | 0.889                   | 2.981                | 32.902              |
| Vibrational   | 169.298                 | 62.007               | 58.624              |

Input orientation:

| Center<br>Number | Atomic<br>Number | Atomic<br>Type | Coordinates (Angstroms) |           |           |
|------------------|------------------|----------------|-------------------------|-----------|-----------|
|                  |                  |                | X                       | Y         | Z         |
| 1                | 29               | 0              | 2.017540                | -0.171946 | 0.182752  |
| 2                | 8                | 0              | 0.660225                | 1.089730  | 0.735621  |
| 3                | 6                | 0              | -0.585833               | 0.935558  | 0.383791  |
| 4                | 6                | 0              | -1.253901               | -0.302097 | 0.449502  |
| 5                | 6                | 0              | -1.304878               | 2.062818  | -0.063411 |
| 6                | 6                | 0              | -2.590574               | -0.405238 | 0.048030  |
| 7                | 6                | 0              | -3.244487               | 0.726150  | -0.379161 |
| 8                | 1                | 0              | -4.275664               | 0.736493  | -0.706641 |
| 9                | 7                | 0              | -2.589130               | 1.901052  | -0.406156 |
| 10               | 6                | 0              | -0.476434               | -1.466584 | 0.973734  |
| 11               | 1                | 0              | -0.132558               | -1.240064 | 1.988968  |
| 12               | 1                | 0              | -1.087812               | -2.368866 | 1.020183  |
| 13               | 6                | 0              | -3.322627               | -1.711070 | 0.041309  |
| 14               | 1                | 0              | -3.269466               | -2.184130 | 1.030568  |
| 15               | 1                | 0              | -4.381537               | -1.535135 | -0.183842 |
| 16               | 6                | 0              | -0.682128               | 3.398077  | -0.161974 |
| 17               | 1                | 0              | -0.357621               | 3.742553  | 0.825547  |
| 18               | 1                | 0              | 0.214080                | 3.346677  | -0.789745 |
| 19               | 1                | 0              | -1.372484               | 4.130743  | -0.584458 |
| 20               | 8                | 0              | -2.726787               | -2.543685 | -0.944098 |
| 21               | 1                | 0              | -3.136741               | -3.414169 | -0.889066 |
| 22               | 8                | 0              | 3.264161                | 1.464931  | 0.081486  |
| 23               | 1                | 0              | 2.682564                | 2.229807  | -0.027200 |
| 24               | 1                | 0              | 3.809541                | 1.434476  | -0.715291 |
| 25               | 7                | 0              | 0.722955                | -1.705867 | 0.143454  |
| 26               | 1                | 0              | 1.210310                | -2.535730 | 0.482355  |
| 27               | 1                | 0              | 0.437464                | -1.908045 | -0.816448 |
| 28               | 1                | 0              | 4.378465                | -0.901830 | -0.473695 |
| 29               | 8                | 0              | 3.602603                | -1.406080 | -0.194761 |
| 30               | 1                | 0              | 3.436382                | -2.036395 | -0.907948 |
| 31               | 1                | 0              | -3.099142               | 2.724129  | -0.724971 |

## Complex E

Zero-point correction= 0.240499 (Hartree/Particle)  
Thermal correction to Energy= 0.258621  
Thermal correction to Enthalpy= 0.259566  
Thermal correction to Gibbs Free Energy= 0.195164  
Sum of electronic and zero-point Energies= -2364.170580  
Sum of electronic and thermal Energies= -2364.152458  
Sum of electronic and thermal Enthalpies= -2364.151514  
Sum of electronic and thermal Free Energies= -2364.215915

|               | E (Thermal)<br>KCal/Mol | CV<br>Cal/Mol-Kelvin | S<br>Cal/Mol-Kelvin |
|---------------|-------------------------|----------------------|---------------------|
| Total         | 162.287                 | 67.306               | 135.544             |
| Electronic    | 0.000                   | 0.000                | 1.377               |
| Translational | 0.889                   | 2.981                | 42.635              |
| Rotational    | 0.889                   | 2.981                | 32.877              |
| Vibrational   | 160.510                 | 61.344               | 58.655              |

Input orientation:

| Center<br>Number | Atomic<br>Number | Atomic<br>Type | Coordinates (Angstroms) |           |           |
|------------------|------------------|----------------|-------------------------|-----------|-----------|
|                  |                  |                | X                       | Y         | Z         |
| 1                | 29               | 0              | 2.011835                | -0.165017 | 0.192301  |
| 2                | 8                | 0              | 0.661303                | 1.080085  | 0.757472  |
| 3                | 6                | 0              | -0.596555               | 0.922890  | 0.390640  |
| 4                | 6                | 0              | -1.245108               | -0.318089 | 0.467898  |
| 5                | 6                | 0              | -1.331516               | 2.037312  | -0.080574 |
| 6                | 6                | 0              | -2.578611               | -0.409110 | 0.061094  |
| 7                | 6                | 0              | -3.204845               | 0.745711  | -0.379424 |
| 8                | 1                | 0              | -4.243555               | 0.700311  | -0.703084 |
| 9                | 7                | 0              | -2.607636               | 1.939685  | -0.444368 |
| 10               | 6                | 0              | -0.460575               | -1.480967 | 0.984881  |
| 11               | 1                | 0              | -0.102807               | -1.269603 | 1.998705  |
| 12               | 1                | 0              | -1.067486               | -2.387679 | 1.029972  |
| 13               | 6                | 0              | -3.327901               | -1.702683 | 0.055805  |
| 14               | 1                | 0              | -3.248487               | -2.208401 | 1.027506  |
| 15               | 1                | 0              | -4.392287               | -1.506399 | -0.126562 |
| 16               | 6                | 0              | -0.655684               | 3.362447  | -0.171722 |
| 17               | 1                | 0              | -0.348697               | 3.724674  | 0.816688  |
| 18               | 1                | 0              | 0.258408                | 3.297895  | -0.774403 |
| 19               | 1                | 0              | -1.322544               | 4.101035  | -0.621308 |
| 20               | 8                | 0              | -2.794436               | -2.535221 | -0.973154 |
| 21               | 1                | 0              | -3.240971               | -3.388049 | -0.927099 |
| 22               | 8                | 0              | 3.242274                | 1.487178  | 0.081643  |
| 23               | 1                | 0              | 2.636618                | 2.233186  | -0.028028 |
| 24               | 1                | 0              | 3.782275                | 1.467197  | -0.718950 |
| 25               | 7                | 0              | 0.734389                | -1.712194 | 0.141128  |
| 26               | 1                | 0              | 1.225815                | -2.547286 | 0.460228  |
| 27               | 1                | 0              | 0.437598                | -1.897069 | -0.818491 |
| 28               | 1                | 0              | 4.387289                | -0.862054 | -0.485814 |
| 29               | 8                | 0              | 3.625891                | -1.376886 | -0.187878 |
| 30               | 1                | 0              | 3.464997                | -2.024187 | -0.886590 |



### Complex E(base)

Zero-point correction= 0.224886 (Hartree/Particle)  
Thermal correction to Energy= 0.243498  
Thermal correction to Enthalpy= 0.244443  
Thermal correction to Gibbs Free Energy= 0.178613  
Sum of electronic and zero-point Energies= -2363.692931  
Sum of electronic and thermal Energies= -2363.674319  
Sum of electronic and thermal Enthalpies= -2363.673375  
Sum of electronic and thermal Free Energies= -2363.739205

|               | E (Thermal)<br>KCal/Mol | CV<br>Cal/Mol-Kelvin | S<br>Cal/Mol-Kelvin |
|---------------|-------------------------|----------------------|---------------------|
| Total         | 152.798                 | 67.809               | 138.551             |
| Electronic    | 0.000                   | 0.000                | 1.377               |
| Translational | 0.889                   | 2.981                | 42.623              |
| Rotational    | 0.889                   | 2.981                | 32.892              |
| Vibrational   | 151.020                 | 61.847               | 61.658              |

Input orientation:

| Center<br>Number | Atomic<br>Number | Atomic<br>Type | Coordinates (Angstroms) |           |           |
|------------------|------------------|----------------|-------------------------|-----------|-----------|
|                  |                  |                | X                       | Y         | Z         |
| 1                | 29               | 0              | 1.960816                | -0.305735 | 0.050680  |
| 2                | 8                | 0              | 0.738213                | 1.117208  | 0.607820  |
| 3                | 6                | 0              | -0.547164               | 0.999912  | 0.338733  |
| 4                | 6                | 0              | -1.227221               | -0.227489 | 0.450070  |
| 5                | 6                | 0              | -1.283691               | 2.141693  | -0.056841 |
| 6                | 6                | 0              | -2.579632               | -0.270537 | 0.098634  |
| 7                | 6                | 0              | -3.196996               | 0.903917  | -0.308008 |
| 8                | 1                | 0              | -4.249277               | 0.887004  | -0.590079 |
| 9                | 7                | 0              | -2.578744               | 2.085795  | -0.369520 |
| 10               | 6                | 0              | -0.451106               | -1.408255 | 0.966815  |
| 11               | 1                | 0              | -0.129327               | -1.172192 | 1.992169  |
| 12               | 1                | 0              | -1.121059               | -2.273651 | 1.060293  |
| 13               | 6                | 0              | -3.372796               | -1.537919 | 0.117722  |
| 14               | 1                | 0              | -3.258340               | -2.065886 | 1.073765  |
| 15               | 1                | 0              | -4.438627               | -1.302751 | -0.002030 |
| 16               | 6                | 0              | -0.592287               | 3.461391  | -0.132697 |
| 17               | 1                | 0              | -0.155093               | 3.743203  | 0.832604  |
| 18               | 1                | 0              | 0.237268                | 3.437510  | -0.850600 |
| 19               | 1                | 0              | -1.293839               | 4.241308  | -0.437024 |
| 20               | 8                | 0              | -2.931398               | -2.373768 | -0.954042 |
| 21               | 1                | 0              | -3.413722               | -3.206251 | -0.899908 |
| 22               | 8                | 0              | 3.404270                | 1.220400  | -0.102434 |
| 23               | 1                | 0              | 2.930018                | 2.025461  | -0.346393 |
| 24               | 1                | 0              | 4.026449                | 1.058049  | -0.822077 |
| 25               | 7                | 0              | 0.734292                | -1.772906 | 0.197951  |
| 26               | 1                | 0              | 0.412441                | -1.963715 | -0.755615 |
| 27               | 1                | 0              | 4.010069                | -1.317825 | -1.297718 |
| 28               | 8                | 0              | 3.535380                | -1.622157 | -0.514141 |
| 29               | 1                | 0              | 3.121227                | -2.456432 | -0.769093 |

## Complex F

Zero-point correction= 0.405381 (Hartree/Particle)  
 Thermal correction to Energy= 0.431422  
 Thermal correction to Enthalpy= 0.432366  
 Thermal correction to Gibbs Free Energy= 0.348184  
 Sum of electronic and zero-point Energies= -2783.446609  
 Sum of electronic and thermal Energies= -2783.420568  
 Sum of electronic and thermal Enthalpies= -2783.419624  
 Sum of electronic and thermal Free Energies= -2783.503806

|               | E (Thermal)<br>KCal/Mol | CV<br>Cal/Mol-Kelvin | S<br>Cal/Mol-Kelvin |
|---------------|-------------------------|----------------------|---------------------|
| Total         | 270.721                 | 98.842               | 177.175             |
| Electronic    | 0.000                   | 0.000                | 1.377               |
| Translational | 0.889                   | 2.981                | 43.844              |
| Rotational    | 0.889                   | 2.981                | 35.734              |
| Vibrational   | 268.944                 | 92.881               | 96.219              |

Input orientation:

| Center<br>Number | Atomic<br>Number | Atomic<br>Type | Coordinates (Angstroms)<br>X Y Z |           |           |
|------------------|------------------|----------------|----------------------------------|-----------|-----------|
| 1                | 29               | 0              | 0.003406                         | -0.063563 | 0.051777  |
| 2                | 8                | 0              | -1.387685                        | -1.275910 | -0.672111 |
| 3                | 6                | 0              | -2.641534                        | -1.028026 | -0.430798 |
| 4                | 6                | 0              | -3.211688                        | 0.254537  | -0.569928 |
| 5                | 6                | 0              | -3.484228                        | -2.088118 | -0.030432 |
| 6                | 6                | 0              | -4.557523                        | 0.471497  | -0.254932 |
| 7                | 6                | 0              | -5.324700                        | -0.593706 | 0.154398  |
| 8                | 1                | 0              | -6.370775                        | -0.515827 | 0.419911  |
| 9                | 7                | 0              | -4.769077                        | -1.816418 | 0.233486  |
| 10               | 6                | 0              | -2.315392                        | 1.339649  | -1.071933 |
| 11               | 1                | 0              | -1.892475                        | 1.030875  | -2.034743 |
| 12               | 1                | 0              | -2.859651                        | 2.272093  | -1.232006 |
| 13               | 6                | 0              | -5.187234                        | 1.828160  | -0.321463 |
| 14               | 1                | 0              | -5.030123                        | 2.277564  | -1.310753 |
| 15               | 1                | 0              | -6.269458                        | 1.732824  | -0.171048 |
| 16               | 6                | 0              | -2.989235                        | -3.472986 | 0.101184  |
| 17               | 1                | 0              | -2.604356                        | -3.833048 | -0.858717 |
| 18               | 1                | 0              | -2.155517                        | -3.511370 | 0.810745  |
| 19               | 1                | 0              | -3.777490                        | -4.148396 | 0.440023  |
| 20               | 8                | 0              | -4.605710                        | 2.636061  | 0.693407  |
| 21               | 1                | 0              | -4.954819                        | 3.529935  | 0.603072  |
| 22               | 7                | 0              | 1.252992                         | -1.652441 | 0.120205  |
| 23               | 1                | 0              | 1.551027                         | -1.895818 | -0.825708 |
| 24               | 1                | 0              | 0.698942                         | -2.439178 | 0.456768  |
| 25               | 7                | 0              | -1.188927                        | 1.545238  | -0.142908 |
| 26               | 1                | 0              | -0.589761                        | 2.296578  | -0.483503 |
| 27               | 1                | 0              | -1.543830                        | 1.849984  | 0.764729  |
| 28               | 6                | 0              | 2.435860                         | -1.470014 | 0.981560  |
| 29               | 1                | 0              | 2.073765                         | -1.277803 | 1.997892  |
| 30               | 1                | 0              | 3.035221                         | -2.382398 | 1.010082  |
| 31               | 6                | 0              | 3.249107                         | -0.297484 | 0.533480  |
| 32               | 6                | 0              | 4.590334                         | -0.413736 | 0.151511  |
| 33               | 6                | 0              | 2.615983                         | 0.963203  | 0.533692  |
| 34               | 6                | 0              | 5.290763                         | 0.722217  | -0.179193 |
| 35               | 6                | 0              | 3.386756                         | 2.095397  | 0.190887  |
| 36               | 1                | 0              | 6.328821                         | 0.722605  | -0.483995 |
| 37               | 7                | 0              | 4.674158                         | 1.916985  | -0.131804 |
| 38               | 8                | 0              | 1.364995                         | 1.128848  | 0.849297  |
| 39               | 6                | 0              | 2.813550                         | 3.456508  | 0.189052  |
| 40               | 1                | 0              | 1.920424                         | 3.488603  | -0.444595 |
| 41               | 1                | 0              | 2.493770                         | 3.736334  | 1.198698  |
| 42               | 1                | 0              | 3.533249                         | 4.195124  | -0.169816 |
| 43               | 6                | 0              | 5.283581                         | -1.737619 | 0.062444  |
| 44               | 1                | 0              | 6.349390                         | -1.576307 | -0.140162 |
| 45               | 1                | 0              | 5.207171                         | -2.276763 | 1.015543  |
| 46               | 8                | 0              | 4.677242                         | -2.485004 | -0.983609 |
| 47               | 1                | 0              | 5.065667                         | -3.367194 | -0.985167 |
| 48               | 1                | 0              | -5.363110                        | -2.590296 | 0.528036  |
| 49               | 1                | 0              | 5.218856                         | 2.743534  | -0.375051 |

## Complex G

Zero-point correction= 0.390788 (Hartree/Particle)  
 Thermal correction to Energy= 0.417041  
 Thermal correction to Enthalpy= 0.417985  
 Thermal correction to Gibbs Free Energy= 0.332229  
 Sum of electronic and zero-point Energies= -2783.002641  
 Sum of electronic and thermal Energies= -2782.976388  
 Sum of electronic and thermal Enthalpies= -2782.975443  
 Sum of electronic and thermal Free Energies= -2783.061200

|               | E (Thermal)<br>KCal/Mol | CV<br>Cal/Mol-Kelvin | S<br>Cal/Mol-Kelvin |
|---------------|-------------------------|----------------------|---------------------|
| Total         | 261.697                 | 98.399               | 180.490             |
| Electronic    | 0.000                   | 0.000                | 1.377               |
| Translational | 0.889                   | 2.981                | 43.836              |
| Rotational    | 0.889                   | 2.981                | 35.715              |
| Vibrational   | 259.920                 | 92.437               | 99.561              |

Input orientation:

| Center<br>Number | Atomic<br>Number | Atomic<br>Type | Coordinates (Angstroms)<br>X Y Z |           |           |
|------------------|------------------|----------------|----------------------------------|-----------|-----------|
| 1                | 29               | 0              | 0.007819                         | -0.048461 | 0.013407  |
| 2                | 8                | 0              | -1.391246                        | -1.263527 | -0.725418 |
| 3                | 6                | 0              | -2.639177                        | -1.023917 | -0.454326 |
| 4                | 6                | 0              | -3.219219                        | 0.257188  | -0.574092 |
| 5                | 6                | 0              | -3.468307                        | -2.089497 | -0.037899 |
| 6                | 6                | 0              | -4.557729                        | 0.466072  | -0.224704 |
| 7                | 6                | 0              | -5.310514                        | -0.604518 | 0.197186  |
| 8                | 1                | 0              | -6.350021                        | -0.533024 | 0.488846  |
| 9                | 7                | 0              | -4.747781                        | -1.825097 | 0.257487  |
| 10               | 6                | 0              | -2.341335                        | 1.347786  | -1.096673 |
| 11               | 1                | 0              | -1.940927                        | 1.040479  | -2.069574 |
| 12               | 1                | 0              | -2.895600                        | 2.276485  | -1.245095 |
| 13               | 6                | 0              | -5.195168                        | 1.820159  | -0.265349 |
| 14               | 1                | 0              | -5.062669                        | 2.280391  | -1.253063 |
| 15               | 1                | 0              | -6.273453                        | 1.717573  | -0.092586 |
| 16               | 6                | 0              | -2.962707                        | -3.472601 | 0.074574  |
| 17               | 1                | 0              | -2.607619                        | -3.828408 | -0.898495 |
| 18               | 1                | 0              | -2.105032                        | -3.508431 | 0.755295  |
| 19               | 1                | 0              | -3.735072                        | -4.153846 | 0.437652  |
| 20               | 8                | 0              | -4.595988                        | 2.621706  | 0.744411  |
| 21               | 1                | 0              | -4.950874                        | 3.514678  | 0.669468  |
| 22               | 7                | 0              | 1.235442                         | -1.648596 | 0.131126  |
| 23               | 1                | 0              | 1.557514                         | -1.898417 | -0.805061 |
| 24               | 1                | 0              | 0.670336                         | -2.431498 | 0.458256  |
| 25               | 7                | 0              | -1.193550                        | 1.560032  | -0.196877 |
| 26               | 1                | 0              | -0.598493                        | 2.303406  | -0.560650 |
| 27               | 1                | 0              | -1.525075                        | 1.879109  | 0.714455  |
| 28               | 6                | 0              | 2.400123                         | -1.452873 | 1.018283  |
| 29               | 1                | 0              | 2.008124                         | -1.247221 | 2.020913  |
| 30               | 1                | 0              | 2.992515                         | -2.369541 | 1.078594  |
| 31               | 6                | 0              | 3.228475                         | -0.295637 | 0.558264  |
| 32               | 6                | 0              | 4.573193                         | -0.410674 | 0.194891  |
| 33               | 6                | 0              | 2.617143                         | 0.967929  | 0.506735  |
| 34               | 6                | 0              | 5.253421                         | 0.740074  | -0.168998 |
| 35               | 6                | 0              | 3.412942                         | 2.078047  | 0.128226  |
| 36               | 1                | 0              | 6.301150                         | 0.675237  | -0.458952 |
| 37               | 7                | 0              | 4.698475                         | 1.956168  | -0.191942 |
| 38               | 8                | 0              | 1.347157                         | 1.147237  | 0.809405  |
| 39               | 6                | 0              | 2.791886                         | 3.432786  | 0.091895  |
| 40               | 1                | 0              | 1.916917                         | 3.452441  | -0.569767 |
| 41               | 1                | 0              | 2.433903                         | 3.735322  | 1.083403  |
| 42               | 1                | 0              | 3.513748                         | 4.174039  | -0.257494 |
| 43               | 6                | 0              | 5.281507                         | -1.726476 | 0.156596  |
| 44               | 1                | 0              | 6.354961                         | -1.556596 | 0.001988  |
| 45               | 1                | 0              | 5.167373                         | -2.266072 | 1.106452  |
| 46               | 8                | 0              | 4.743426                         | -2.504081 | -0.912762 |
| 47               | 1                | 0              | 5.164724                         | -3.370528 | -0.892635 |
| 48               | 1                | 0              | -5.331802                        | -2.602929 | 0.561493  |

## Complex H

Zero-point correction= 0.377609 (Hartree/Particle)  
 Thermal correction to Energy= 0.403338  
 Thermal correction to Enthalpy= 0.404282  
 Thermal correction to Gibbs Free Energy= 0.320706  
 Sum of electronic and zero-point Energies= -2782.556296  
 Sum of electronic and thermal Energies= -2782.530567  
 Sum of electronic and thermal Enthalpies= -2782.529623  
 Sum of electronic and thermal Free Energies= -2782.613199

|               | E (Thermal)<br>KCal/Mol | CV<br>Cal/Mol-Kelvin | S<br>Cal/Mol-Kelvin |
|---------------|-------------------------|----------------------|---------------------|
| Total         | 253.098                 | 97.279               | 175.900             |
| Electronic    | 0.000                   | 0.000                | 1.377               |
| Translational | 0.889                   | 2.981                | 43.829              |
| Rotational    | 0.889                   | 2.981                | 35.689              |
| Vibrational   | 251.321                 | 91.317               | 95.005              |

Input orientation:

| Center<br>Number | Atomic<br>Number | Atomic<br>Type | Coordinates (Angstroms)<br>X Y Z |           |           |
|------------------|------------------|----------------|----------------------------------|-----------|-----------|
| 1                | 29               | 0              | 0.000861                         | 0.000613  | -0.003390 |
| 2                | 8                | 0              | -1.358065                        | -1.180342 | -0.816280 |
| 3                | 6                | 0              | -2.622447                        | -0.971578 | -0.513351 |
| 4                | 6                | 0              | -3.208715                        | 0.303356  | -0.585185 |
| 5                | 6                | 0              | -3.440196                        | -2.057437 | -0.110341 |
| 6                | 6                | 0              | -4.547828                        | 0.454000  | -0.214407 |
| 7                | 6                | 0              | -5.249240                        | -0.674885 | 0.177757  |
| 8                | 1                | 0              | -6.292785                        | -0.582058 | 0.475366  |
| 9                | 7                | 0              | -4.719991                        | -1.902147 | 0.218743  |
| 10               | 6                | 0              | -2.355672                        | 1.432081  | -1.069375 |
| 11               | 1                | 0              | -1.962870                        | 1.192283  | -2.064130 |
| 12               | 1                | 0              | -2.927906                        | 2.359179  | -1.157288 |
| 13               | 6                | 0              | -5.228556                        | 1.784821  | -0.196358 |
| 14               | 1                | 0              | -5.102465                        | 2.308831  | -1.153343 |
| 15               | 1                | 0              | -6.305558                        | 1.639429  | -0.041370 |
| 16               | 6                | 0              | -2.845834                        | -3.423640 | -0.056622 |
| 17               | 1                | 0              | -2.511625                        | -3.752930 | -1.048060 |
| 18               | 1                | 0              | -1.958637                        | -3.446541 | 0.588536  |
| 19               | 1                | 0              | -3.574728                        | -4.144662 | 0.319460  |
| 20               | 8                | 0              | -4.676505                        | 2.566547  | 0.863121  |
| 21               | 1                | 0              | -5.084091                        | 3.439231  | 0.833727  |
| 22               | 7                | 0              | 1.194001                         | -1.621177 | 0.173608  |
| 23               | 1                | 0              | 1.513986                         | -1.907898 | -0.752523 |
| 24               | 1                | 0              | 0.604221                         | -2.377445 | 0.518889  |
| 25               | 7                | 0              | -1.192180                        | 1.622422  | -0.180638 |
| 26               | 1                | 0              | -0.602301                        | 2.378599  | -0.525948 |
| 27               | 1                | 0              | -1.512221                        | 1.909266  | 0.745435  |
| 28               | 6                | 0              | 2.357559                         | -1.430870 | 1.062270  |
| 29               | 1                | 0              | 1.964821                         | -1.191298 | 2.057105  |
| 30               | 1                | 0              | 2.929897                         | -2.357928 | 1.149960  |
| 31               | 6                | 0              | 3.210467                         | -0.301980 | 0.578228  |
| 32               | 6                | 0              | 4.549580                         | -0.452438 | 0.207372  |
| 33               | 6                | 0              | 2.624091                         | 0.972923  | 0.506663  |
| 34               | 6                | 0              | 5.250887                         | 0.676582  | -0.184584 |
| 35               | 6                | 0              | 3.441734                         | 2.058926  | 0.103833  |
| 36               | 1                | 0              | 6.294430                         | 0.583901  | -0.482244 |
| 37               | 7                | 0              | 4.721533                         | 1.903807  | -0.225315 |
| 38               | 8                | 0              | 1.359705                         | 1.181519  | 0.809692  |
| 39               | 6                | 0              | 2.847279                         | 3.425101  | 0.050408  |
| 40               | 1                | 0              | 1.960004                         | 3.448073  | -0.594638 |
| 41               | 1                | 0              | 2.513174                         | 3.754201  | 1.041945  |
| 42               | 1                | 0              | 3.576098                         | 4.146217  | -0.325636 |
| 43               | 6                | 0              | 5.230405                         | -1.783203 | 0.189029  |
| 44               | 1                | 0              | 6.307380                         | -1.637710 | 0.033951  |
| 45               | 1                | 0              | 5.104449                         | -2.307384 | 1.145939  |
| 46               | 8                | 0              | 4.678295                         | -2.564792 | -0.870522 |
| 47               | 1                | 0              | 5.086044                         | -3.437408 | -0.841392 |
